# Supplementary material for: Impact analysis of moisture stress on growth and yield of cotton using DSSAT-CROPGRO-cotton model under semi-arid climate
Source: PeerJ. 2023 Nov 9;11:e16329. doi: 10.7717/peerj.16329 (PMC10640844; doi:10.7717/peerj.16329)
Supplement: Supplemental Information 1 [file peerj-11-16329-s001.xls]

## Sheet: Weather graph
		Tmax		Tmin		RH₁		RH₂		Rain		Evap
		2018	2019	2018	2019	2018	2019	2018	2019	2018	2019	2018	2019
	P₁	36.9857	39.3571	23.9714	22.2143	60.4286	39.2857	28.4286	17.4286	7.8	0	63.5	72.9
	P₂	38.9482	39.3786	25.6018	24.7893	58.7321	58.5536	31.3571	31.3214	106.2	86.8	495	488
	P₃	34.6214	34.25	27.1393	27.3821	83.2143	79.5	60.8571	62.6071	120.1	133.7	150.8	165.2
	P₄	34.3408	34.8592	26.8245	26.9694	82.6531	84.5102	63.1429	57.7143	84.3	110.1	229.1	227.6
	P₅	30.9929	30.9625	16.9607	18.6304	86.8036	85.6786	42.9821	47.4643	95.6	17.1	169.6	186
	Figure 1Variation in weather conditions mean temperature (time series), mean relative humidity (time series), total rainfall (histogram), total evaporation (histogram) at different pheno-phases of cotton during 2018 and 2019.
		Rain=Total rainfall (mm); Evap= total evaporation (mm); Tmin & Tmax= minimum & maximum temperature (°C); RH₁ & RH₂= morning and afternoon relative humidity (%); P₁: sowing to emergence (DAS); P₂: emergence to 50% squaring; P₃:50% squaring to 50% flowering; P₄:50% flowering to 50% boll formation; P₅: 50% boll formation to maturity (DAS).

## Sheet: Rainfall graph
	Rainfall		Cumulative rainfall (mm)
DAS	2018	2019
0	0	0	0	0
1	0	0	0	0
2	0	0	0	0
3	0	0	0	0
4	0	3.8	0	3.8
5	0	0	0	3.8
6	7.8	0	7.8	3.8
7	0	0	7.8	3.8
8	0	0	7.8	3.8
9	0	0	7.8	3.8
10	0	0	7.8	3.8
11	0	0	7.8	3.8
12	0	0	7.8	3.8
13	0	0	7.8	3.8
14	0	0	7.8	3.8
15	0	0	7.8	3.8
16	0	0	7.8	3.8
17	0	0	7.8	3.8
18	0	0	7.8	3.8
19	0	0	7.8	3.8
20	0	0	7.8	3.8
21	0	0	7.8	3.8
22	0	0	7.8	3.8
23	0	0	7.8	3.8
24	0	9	7.8	12.8	2018	2019
25	0	0	7.8	12.8	345	283.9
26	0	0	7.8	12.8	21	19
27	0	3.8	7.8	16.6	125	118
28	0	0	7.8	16.6	5	14
29	0	18.2	7.8	34.8
30	0	0	7.8	34.8
31	0	0	7.8	34.8
32	0	0.6	7.8	35.4
33	0	0	7.8	35.4
34	0	0	7.8	35.4
35	0	0	7.8	35.4
36	0	0	7.8	35.4
37	0	0	7.8	35.4
38	0	0	7.8	35.4
39	0	0	7.8	35.4
40	5.8	0	13.6	35.4
41	0	0	13.6	35.4
42	0	0	13.6	35.4
43	0	11.9	13.6	47.3
44	3	0	16.6	47.3
45	0	0	16.6	47.3
46	0	0	16.6	47.3
47	0	0	16.6	47.3
48	0	14.8	16.6	62.1
49	0	0	16.6	62.1
50	0	2.2	16.6	64.3
51	39	0	55.6	64.3
52	0	0	55.6	64.3
53	0	0	55.6	64.3
54	0	0.6	55.6	64.9
55	0	0.9	55.6	65.8
56	0	2.4	55.6	68.2
57	14.2	42.3	69.8	110.5
58	0	52.7	69.8	163.2
59	0	0	69.8	163.2
60	0	0	69.8	163.2
61	3	0.4	72.8	163.6
62	2.1	4.6	74.9	168.2
63	4.8	0	79.7	168.2
64	34.3	0.3	114	168.5
65	0	0	114	168.5
66	6.5	0	120.5	168.5
67	8.3	0	128.8	168.5
68	0	0.4	128.8	168.9
69	6	0.2	134.8	169.1
70	0	0.7	134.8	169.8
71	0	0	134.8	169.8
72	0	0	134.8	169.8
73	0	8.6	134.8	178.4
74	0	12.5	134.8	190.9
75	0	3.3	134.8	194.2
76	0	0	134.8	194.2
77	0	0	134.8	194.2
78	0	0	134.8	194.2
79	0	5	134.8	199.2
80	0	0	134.8	199.2
81	0	0	134.8	199.2
82	0	0	134.8	199.2
83	0	7.4	134.8	206.6
84	0	0	134.8	206.6
85	27.4	1.3	162.2	207.9
86	46	0	208.2	207.9
87	2.7	12.3	210.9	220.2
88	0	0	210.9	220.2
89	0	1.4	210.9	221.6
90	12	5.2	222.9	226.8
91	2	0	224.9	226.8
92	0	0	224.9	226.8
93	9.2	0	234.1	226.8
94	0	0	234.1	226.8
95	0	0	234.1	226.8
96	0	0	234.1	226.8
97	0	0	234.1	226.8
98	0	0	234.1	226.8
99	0	0	234.1	226.8
100	0	0	234.1	226.8
101	0	0	234.1	226.8
102	2	0	236.1	226.8
103	0	6.6	236.1	233.4
104	1	0	237.1	233.4
105	0	45.8	237.1	279.2
106	9	0	246.1	279.2
107	0	0	246.1	279.2
108	0	0	246.1	279.2
109	0	0	246.1	279.2
110	32.6	0	278.7	279.2
111	0	0	278.7	279.2
112	0	0	278.7	279.2
113	0	0	278.7	279.2
114	30.5	0	309.2	279.2
115	0	0	309.2	279.2
116	0	0	309.2	279.2
117	0	0	309.2	279.2
118	2.4	0	311.6	279.2
119	0	0	311.6	279.2
120	0	0	311.6	279.2
121	0	0	311.6	279.2
122	0	0	311.6	279.2
123	0	0	311.6	279.2
124	0	0	311.6	279.2
125	0	0	311.6	279.2
126	0	0	311.6	279.2
127	0	0	311.6	279.2
128	0	0	311.6	279.2
129	0	0	311.6	279.2
130	0	0	311.6	279.2
131	0	0	311.6	279.2
132	0	1	311.6	280.2
133	0	0	311.6	280.2
134	6.8	0	318.4	280.2
135	0	0	318.4	280.2
136	0	0	318.4	280.2
137	0	0.4	318.4	280.6
138	0	3.3	318.4	283.9
139	0	0	318.4	283.9
140	0	0	318.4	283.9
141	0	0	318.4	283.9
142	0	0	318.4	283.9
143	0	0	318.4	283.9
144	0	0	318.4	283.9
145	0	0	318.4	283.9
146	0	0	318.4	283.9
147	0	0	318.4	283.9
148	0	0	318.4	283.9
149	26.6	0	345	283.9
150	0	0	345	283.9
	2018	2019
Total	345	283.9
Rainydays	21	19
Drydays	125	118
Showers	5	14

## Sheet: Growth and yield
Growth and yield of cotton as affected by different moisture regimes
	LAI			Plant height (cm)			Seed cotton yield (kg/ha)			Above ground biomass (kg/ha)
	2018	2019	Pooled	2018	2019	Pooled	2018	2019	Pooled	2018	2019	Pooled
M₁	4	4.8	4.3	187.7	163.7	175.7	3464	3373	3418	12821	11130	11163
M₂	2.5	4.2	2.8	140.4	115.2	127.8	2479	2103	2291	7342	6251	6330
M₃	3.3	4.6	3.5	157.3	138.8	148.1	2997	2645	2821	9273	8538	8817
LSD (p=0.05)	0.1	0.2	0.9	5.5	7.2	3.8	297	218	153	813	1011	917
Figure 3 Mean leaf area index (a), plant height (b), seed cotton yield (c) and above ground biomass (d) under different irrigation levels.
	(M1:Control/well watered, M2 :rainfed after one post-sowing irrigation (POSI) at 30-35 DAS (days after sowing), M3: rainfed after two post-sowing irrigations).

## Sheet: Validation
			EMERGENCE					Anthesis						First boll day						harvest mat						SCY						AGB						LAI						Height
		2018 OBS	2018 SIM	2019 OBS	2019 SIM			2018 OBS	2018 SIM	2019 OBS	2019 SIM			2018 OBS	2018 SIM	2019 OBS	2019 SIM			2018 OBS	2018 SIM	2019 OBS	2019 SIM			2018 OBS	2018 SIM	2019 OBS	2019 SIM			2018 OBS	2018 SIM	2019 OBS	2019 SIM			2018 OBS	2018 SIM	2019 OBS	2019 SIM			2018 OBS	2018 SIM	2019 OBS	2019 SIM
	M₁	6	6	5	5		M1	75	75	72	73		M1	100	99	101	99		M1	189	187	185	184		M1	3966.73	4105.6	3372.83	3270		M1	12821.3	13372.2	11130.3	10250		M1	3.99167	4.05	4.82007	4.92		M1	1.87729	1.98	1.6	1.72
	M₂	6	6	5	5		M2	70	69	67	66		M2	87	88	85	86		M2	170	174	164	169		M2	2839.21	2795	2103.26	2320		M2	7341.65	7230	6251	6511.8		M2	2.52417	2.42	4.19	4.1987		M2	1.40437	1.33	1.15236	1.23
	M₃	6	6	5	5		M3	72	73	69	70		M3	90	92	89	94		M3	176	178	171	174		M3	3432.46	3370	2645.28	2852.97		M3	9272.93	9820	9542.05	9650.35		M3	3.26875	3.18	4.64	4.45		M3	1.57312	1.59	1.38833	1.35
		EMERGENCE			Antheis			First boll day			Phy mat.			SCY			AGB			LAI			Height
	Mean_Obs	7	6	Mean_Obs	64.6667	63	Mean_Obs	78.6667	75	Mean_Obs	128.333	126	Mean_Obs	2980.2	2594	Mean_Obs	9265.37	9310	Mean_Obs	4.75667	4.55	Mean_Obs	1.75	1.74
	SD_Obs	0	0	SD_Obs	0.57735	0.943	SD_Obs	0.57735	1.414	SD_Obs	1.1547	1.7	SD_Obs	492.525	382.161	SD_Obs	1617.9	1592.47	SD_Obs	0.0757188	0.265	SD_Obs	0.170587	0.113
	Mean_Sim	7	6	Mean_Sim	65	63	Mean_Sim	79	76	Mean_Sim	129	127	Mean_Sim	2976.73	2565	Mean_Sim	9189.67	9417	Mean_Sim	4.85333	4.58	Mean_Sim	1.82333	1.77
	SD_Sim	0	0	SD_Sim	0	0	SD_Sim	0	0	SD_Sim	1	0.943	SD_Sim	501.591	343.463	SD_Sim	1961.73	1308.04	SD_Sim	0.151438	0.108	SD_Sim	0.155027	0.103
	MAE	0	0	MAE	0.333333	1	MAE	0.333333	1	MAE	0.666667	1	MAE	71.8667	122	MAE	266.7	520	MAE	0.0966667	0.16	MAE	0.0733333	0.04
	MBE	0	0	MBE	0.333333	0	MBE	0.333333	1	MBE	0.666667	1	MBE	-3.46667	-28	MBE	-75.7	107	MBE	0.0966667	0.03	MBE	0.0733333	0.04
	RMSE	0	0	RMSE	0.57735	1	RMSE	0.57735	1.732	RMSE	0.816497	1.291	RMSE	75.102	144.588	RMSE	320.434	537.972	RMSE	0.117047	0.178	RMSE	0.0828654	0.038
	d-Stat	0	0	d-Stat	0.5	0.372	d-Stat	0.5	0.471	d-Stat	0.769231	0.789	d-Stat	0.991366	0.959	d-Stat	0.987964	0.965	d-Stat	0.595472	0.763	d-Stat	0.901309	0.97

## Sheet: SIM_LAID & CWAD
									LAID																				CWAD																2019
													2018										2019										2018
@	YEAR	DOY	DAS	DAP	LAID	CWAD			Recommended irrigation Simulated	Recommended irrigation Observed	One post-sowing irrigation Simulated	One post-sowing irrigation Observed	Two post-sowing irrigation Simulated	Two post-sowing irrigation Observed	Automated irrigation	No irrigation/ Rainfed			Recommended irrigation	Recommended irrigation Observed	One post-sowing irrigation	One post-sowing irrigation Observed	Two post-sowing irrigation	Two post-sowing irrigation Observed	Automated irrigation	No irrigation/ Rainfed			Recommended irrigation	Recommended irrigation Observed	One post-sowing irrigation	One post-sowing irrigation Observed	Two post-sowing irrigation	Two post-sowing irrigation Observed	Automated irrigation	No irrigation/ Rainfed			Recommended irrigation	Recommended irrigation Observed	One post-sowing irrigation	One post-sowing irrigation Observed	Two post-sowing irrigation	Two post-sowing irrigation Observed	Automated irrigation	No irrigation/ Rainfed
T1	2018	118	8	0	0	0		0	0		0		0		0	0			0		0		0		0	0		0	0		0		0		0	0			0		0		0		0	0
	2018	119	9	1	0	0		1	0		0		0		0	0			0		0		0		0	0		1	0		0		0		0	0			0		0		0		0	0
	2018	120	10	2	0	0		2	0		0		0		0	0			0		0		0		0	0		2	0		0		0		0	0			0		0		0		0	0
	2018	121	11	3	0	0		3	0		0		0		0	0			0		0		0		0	0		3	0		0		0		0	0			0		0		0		0	0
	2018	122	12	4	0	0		4	0		0		0		0	0			0		0		0		0	0		4	0		0		0		0	0			0		0		0		0	0
	2018	123	13	5	0	0		5	0		0		0		0	0			0		0		0		0	0		5	0		0		0		0	0			0		0		0		0	0
	2018	124	14	6	0	0		6	0		0		0		0	0			0		0		0		0	0		6	0		0		0		0	0			0		0		0		0	0
	2018	125	15	7	0.001	1		7	0.001		0.001		0.001		0.001	0.001			0.001		0.001		0.001		0.001	0.001		7	1		1		1		1	1			1		1		1		1	1
	2018	126	16	8	0.002	1		8	0.002		0.002		0.002		0.002	0.002			0.002		0.002		0.002		0.002	0.002		8	1		1		1		1	1			2		2		2		2	2
	2018	127	17	9	0.003	2		9	0.003		0.003		0.003		0.003	0.003			0.003		0.003		0.003		0.003	0.003		9	2		2		2		2	2			3		3		3		3	3
	2018	128	18	10	0.003	2		10	0.003		0.003		0.003		0.003	0.003			0.003		0.003		0.003		0.003	0.003		10	2		2		2		2	2			3		3		3		3	3
	2018	129	19	11	0.004	3		11	0.004		0.004		0.004		0.004	0.004			0.004		0.004		0.004		0.004	0.004		11	3		3		3		3	3			4		4		4		4	4
	2018	130	20	12	0.005	3		12	0.005		0.005		0.005		0.005	0.005			0.005		0.005		0.005		0.005	0.005		12	3		3		3		3	3			4		4		4		4	4
	2018	131	21	13	0.007	4		13	0.007		0.007		0.007		0.007	0.007			0.006		0.006		0.006		0.006	0.006		13	4		4		4		4	4			5		5		5		5	5
	2018	132	22	14	0.008	5		14	0.008		0.008		0.008		0.008	0.008			0.008		0.008		0.008		0.008	0.008		14	5		5		5		5	5			5		5		5		5	5
	2018	133	23	15	0.01	6		15	0.01		0.01		0.01		0.01	0.01			0.01		0.01		0.01		0.01	0.01		15	6		6		6		6	6			6		6		6		6	6
	2018	134	24	16	0.011	6		16	0.011		0.012		0.012		0.012	0.012			0.011		0.011		0.011		0.011	0.011		16	6		6		6		6	6			7		7		7		7	7
	2018	135	25	17	0.013	7		17	0.013		0.013		0.013		0.013	0.013			0.013		0.013		0.013		0.013	0.013		17	7		7		7		7	7			8		8		8		8	8
	2018	136	26	18	0.014	8		18	0.014		0.015		0.015		0.015	0.015			0.014		0.015		0.015		0.015	0.015		18	8		8		8		8	8			9		9		9		9	9
	2018	137	27	19	0.016	9		19	0.016		0.016		0.016		0.016	0.016			0.016		0.016		0.016		0.016	0.016		19	9		9		9		9	9			9		9		9		9	9
	2018	138	28	20	0.017	9		20	0.017		0.018		0.018		0.018	0.018			0.017		0.017		0.017		0.017	0.017		20	9		10		10		10	10			11		10		10		10	10
	2018	139	29	21	0.019	11		21	0.019		0.019		0.019		0.019	0.019			0.018		0.018		0.018		0.018	0.018		21	11		11		11		11	11			12		12		12		12	12
	2018	140	30	22	0.02	12		22	0.02		0.02		0.02		0.02	0.02			0.02		0.02		0.02		0.02	0.02		22	12		12		12		12	12			13		13		13		13	13
	2018	141	31	23	0.022	13		23	0.022		0.022		0.022		0.022	0.022			0.021		0.021		0.021		0.021	0.021		23	13		13		13		13	13			14		14		14		14	14
	2018	142	32	24	0.025	15		24	0.025		0.025		0.025		0.025	0.025			0.024		0.023		0.023		0.023	0.023		24	15		15		15		15	15			16		16		16		16	16
	2018	143	33	25	0.027	16		25	0.027		0.028		0.028		0.028	0.028			0.027		0.027		0.027		0.027	0.027		25	16		17		17		17	17			18		18		18		18	18
	2018	144	34	26	0.03	18		26	0.03		0.03		0.03		0.03	0.03			0.029		0.029		0.029		0.029	0.029		26	18		19		19		19	19			20		20		20		20	20
	2018	145	35	27	0.033	20		27	0.033		0.033		0.033		0.033	0.033			0.032		0.032		0.032		0.032	0.032		27	20		21		21		21	21			22		22		22		22	22
	2018	146	36	28	0.035	23		28	0.035		0.035		0.035		0.035	0.035			0.035		0.035		0.035		0.035	0.035		28	23		23		23		23	23			24		24		24		24	24
	2018	147	37	29	0.04	25		29	0.04		0.04		0.04		0.04	0.04			0.04		0.04		0.04		0.04	0.04		29	25		26		26		26	26			28		28		28		28	28
	2018	148	38	30	0.045	29		30	0.045		0.045		0.045		0.045	0.045			0.045		0.045		0.045		0.045	0.045		30	29		29		29		29	29			31		31		31		31	31
	2018	149	39	31	0.051	32		31	0.051		0.051		0.051		0.051	0.051			0.052		0.052		0.052		0.052	0.052		31	32		32		32		32	32			35		35		35		35	35
	2018	150	40	32	0.058	36		32	0.058		0.059		0.059		0.059	0.059			0.059		0.058		0.058		0.058	0.058		32	36		37		37		37	37			40		40		40		40	40
	2018	151	41	33	0.066	41		33	0.066		0.067		0.067		0.067	0.067			0.066		0.066		0.066		0.066	0.066		33	41		41		41		41	41			44		44		44		44	44
	2018	152	42	34	0.075	46		34	0.075		0.075		0.075		0.075	0.075			0.073		0.073		0.073		0.073	0.073		34	46		46		46		46	46			49		49		49		49	49
	2018	153	43	35	0.085	52		35	0.085		0.086		0.086		0.086	0.086			0.082		0.082		0.082		0.082	0.082		35	52		53		53		53	53			54		54		54		54	54
	2018	154	44	36	0.097	59		36	0.097		0.097		0.097		0.096	0.096			0.092		0.092		0.092		0.093	0.093		36	59		60		60		61	61			61		61		61		61	61
	2018	155	45	37	0.109	67		37	0.109		0.11		0.11		0.108	0.108			0.105		0.105		0.105		0.104	0.104		37	67		68		68		69	69			69		69		69		70	70
	2018	156	46	38	0.123	76		38	0.123		0.124		0.124		0.12	0.12			0.118		0.118		0.118		0.115	0.115		38	76		76		76		78	78			78		78		78		80	80
	2018	157	47	39	0.139	86		39	0.139		0.14		0.14		0.133	0.133			0.132		0.133		0.133		0.127	0.127		39	86		87		87		89	89			89		89		89		91	91
	2018	158	48	40	0.157	98		40	0.157	1.75	0.157	1.5	0.157	1.5	0.145	0.145			0.148	1.6	0.149	1.5	0.149	1.5	0.138	0.138		40	98	104.727	99	105.636	99	105.636	102	102			101	106.636	101	106.636	101	106.636	104	104
	2018	159	49	41	0.175	111		41	0.175		0.176		0.176		0.157	0.157			0.165		0.165		0.165		0.147	0.147		41	111		112		112		114	114			114		114		114		117	117
	2018	160	50	42	0.197	123		42	0.197		0.198		0.198		0.176	0.176			0.183		0.184		0.184		0.159	0.159		42	123		124		124		124	124			128		128		128		130	130
	2018	161	51	43	0.219	140		43	0.219		0.221		0.221		0.187	0.187			0.202		0.202		0.202		0.168	0.167		43	140		141		141		140	140			142		142		142		136	142
	2018	162	52	44	0.244	160		44	0.244		0.245		0.245		0.202	0.2			0.223		0.224		0.224		0.184	0.179		44	160		161		161		149	157			159		159		159		147	157
	2018	163	53	45	0.27	180		45	0.27		0.271		0.271		0.219	0.213			0.249		0.249		0.249		0.201	0.192		45	180		181		181		161	173			178		178		178		160	173
	2018	164	54	46	0.3	197		46	0.3		0.301		0.301		0.236	0.235			0.277		0.278		0.278		0.223	0.203		46	197		198		198		171	185			202		202		202		178	191
	2018	165	55	47	0.332	215		47	0.332		0.334		0.334		0.26	0.258			0.309		0.309		0.309		0.249	0.216		47	215		216		216		184	200			227		227		227		198	209
	2018	166	56	48	0.368	236		48	0.368		0.37		0.37		0.288	0.28			0.34		0.341		0.341		0.275	0.226		48	236		237		237		199	216			255		255		255		221	228
	2018	167	57	49	0.406	258		49	0.406		0.409		0.409		0.319	0.302			0.379		0.38		0.38		0.308	0.241		49	258		260		260		217	234			286		286		286		246	248
	2018	168	58	50	0.441	287		50	0.441		0.444		0.444		0.347	0.32			0.42		0.421		0.421		0.342	0.254		50	287		289		289		239	255			321		321		321		275	269
	2018	169	59	51	0.484	315		51	0.484		0.487		0.487		0.383	0.34			0.461		0.461		0.461		0.377	0.272		51	315		317		317		262	275			353		354		354		302	287
	2018	170	60	52	0.526	356		52	0.526		0.529		0.529		0.417	0.353			0.508		0.509		0.509		0.417	0.287		52	356		358		358		294	301			394		395		395		336	311
	2018	171	61	53	0.573	400		53	0.573		0.576		0.576		0.455	0.365			0.561		0.562		0.562		0.463	0.304		53	400		402		402		330	327			437		437		437		372	333
	2018	172	62	54	0.624	447		54	0.624		0.627		0.627		0.497	0.372			0.612		0.612		0.613		0.507	0.309		54	447		450		450		368	353			490		490		491		415	359
	2018	173	63	55	0.681	489		55	0.681		0.685		0.685		0.545	0.395			0.668		0.665		0.669		0.555	0.31		55	489		492		492		402	376			544		548		544		462	383
	2018	174	64	56	0.74	542		56	0.74		0.742		0.744		0.594	0.407			0.73		0.714		0.731		0.608	0.312		56	542		545		545		446	404			603		613		603		512	407
	2018	175	65	57	0.799	603		57	0.799		0.793		0.804		0.644	0.407			0.797		0.781		0.798		0.667	0.341		57	603		613		606		496	424			646		656		646		549	426
	2018	176	66	58	0.867	665		58	0.867		0.85		0.872		0.701	0.407			0.869		0.813		0.87		0.73	0.351		58	665		684		669		549	451			711		724		711		605	454
	2018	177	67	59	0.938	734		59	0.938		0.852		0.943		0.761	0.407			0.943		0.811		0.943		0.795	0.351		59	734		745		738		606	473			782		759		782		668	478
	2018	178	68	60	1.014	786		60	1.014	3.3	0.928	2	1.02	3.2	0.827	0.436			1.026	3.2	0.826	2	1.026	3	0.869	0.363		60	786	793.818	793	796.636	790	798.091	650	496			854	881.364	822	808.545	854	880.182	731	504
	2018	179	69	61	1.092	841		61	1.092		1.003		1.098		0.894	0.462			1.108		0.824		1.109		0.942	0.363		61	841		846		845		697	519			935		850		935		802	528
	2018	180	70	62	1.177	898		62	1.177		1.079		1.183		0.967	0.493			1.194		0.823		1.195		1.019	0.364		62	898		903		903		747	544			1018		884		1018		876	552
	2018	181	71	63	1.268	972		63	1.268		1.128		1.275		1.047	0.513			1.289		0.825		1.289		1.104	0.369		63	972		975		977		810	575			1106		948		1106		955	581
	2018	182	72	64	1.368	1054		64	1.368		1.148		1.375		1.133	0.531			1.386		0.83		1.382		1.192	0.374		64	1054		1050		1060		882	606			1196		1008		1196		1036	608
	2018	183	73	65	1.468	1148		65	1.468		1.145		1.475		1.222	0.536			1.483		0.845		1.419		1.284	0.387		65	1148		1117		1154		963	640			1300		1082		1287		1129	637
	2018	184	74	66	1.572	1226		66	1.572		1.207		1.579		1.313	0.562			1.587		0.853		1.415		1.382	0.393		66	1226		1183		1232		1032	667			1411		1147		1343		1223	666
	2018	185	75	67	1.668	1313		67	1.668		1.249		1.676		1.398	0.584			1.63		0.88		1.433		1.488	0.41		67	1313		1254		1319		1108	698			1503		1212		1427		1317	693
	2018	186	76	68	1.77	1388		68	1.77		1.315		1.778		1.489	0.609			1.644		0.907		1.451		1.598	0.424		68	1388		1315		1395		1176	725			1610		1282		1532		1425	724
	2018	187	77	69	1.877	1509		69	1.877		1.311		1.879		1.589	0.615			1.762		0.968		1.57		1.707	0.458		69	1509		1408		1515		1279	766			1686		1328		1606		1498	743
	2018	188	78	70	1.981	1641		70	1.981		1.316		1.93		1.692	0.622			1.791		0.991		1.604		1.826	0.472		70	1641		1490		1639		1387	804			1812		1408		1723		1614	780
	2018	189	79	71	1.987	1752		71	1.987		1.314		1.922		1.796	0.626			1.823		1.01		1.65		1.949	0.492		71	1752		1572		1741		1502	843			1928		1471		1830		1727	808
	2018	190	80	72	2.003	1858		72	2.003		1.325		1.933		1.909	0.637			1.899		1.04		1.704		2.076	0.511		72	1858		1649		1848		1612	880			2046		1537		1939		1844	840
	2018	191	81	73	2.111	1976		73	2.111		1.362		2.024		2.027	0.659			2.016		1.091		1.807		2.192	0.542		73	1976		1715		1960		1714	912			2124		1578		2013		1924	860
	2018	192	82	74	2.227	2073		74	2.227		1.404		2.129		2.136	0.685			2.126		1.138		1.897		2.308	0.571		74	2073		1771		2060		1803	941			2207		1622		2089		2004	883
	2018	193	83	75	2.318	2183		75	2.318		1.439		2.205		2.25	0.707			2.228		1.182		1.978		2.42	0.596		75	2183		1835		2164		1904	974			2293		1667		2165		2087	907
	2018	194	84	76	2.407	2292		76	2.407		1.471		2.28		2.364	0.73			2.273		1.194		1.991		2.542	0.614		76	2292		1897		2267		2004	1006			2416		1743		2284		2215	943
	2018	195	85	77	2.422	2434		77	2.422		1.467		2.292		2.477	0.743			2.359		1.236		2.055		2.657	0.64		77	2434		1980		2405		2142	1050			2498		1784		2353		2305	967
	2018	196	86	78	2.439	2570		78	2.439		1.463		2.292		2.585	0.753			2.431		1.266		2.11		2.768	0.666		78	2570		2046		2535		2285	1093			2584		1834		2431		2399	993
	2018	197	87	79	2.481	2688		79	2.481		1.462		2.303		2.7	0.767			2.485		1.293		2.147		2.87	0.686		79	2688		2125		2648		2416	1132			2673		1882		2511		2496	1022
	2018	198	88	80	2.607	2742		80	2.607	4	1.466	2.15	2.418	3.77	2.816	0.783			2.634	3.9	1.291	2.5	2.26	3.5	2.974	0.696		80	2742	2717.91	2191	2156.09	2694	2666.36	2543	1168			2761	3068.09	1972	1963.73	2568	2679.55	2651	1066
	2018	199	89	81	2.665	2795		81	2.665		1.459		2.483		2.928	0.795			2.706		1.289		2.351		3.095	0.709		81	2795		2252		2741		2667	1206			2836		2043		2636		2803	1106
	2018	200	90	82	2.729	2882		82	2.729		1.448		2.537		3.036	0.807			2.774		1.291		2.402		3.214	0.723		82	2882		2304		2814		2796	1244			2931		2111		2708		2946	1144
	2018	201	91	83	2.823	2983		83	2.823		1.441		2.626		3.139	0.817			2.878		1.286		2.496		3.333	0.734		83	2983		2329		2907		2921	1283			3051		2159		2814		3092	1184
	2018	202	92	84	2.922	3116		84	2.922		1.433		2.721		3.239	0.82			2.965		1.291		2.581		3.424	0.754		84	3116		2350		3032		3073	1329			3127		2202		2882		3185	1208
	2018	203	93	85	3.002	3212		85	3.002		1.424		2.8		3.32	0.826			3.071		1.284		2.683		3.529	0.756		85	3212		2408		3123		3185	1363			3279		2204		3023		3353	1263
	2018	204	94	86	3.087	3319		86	3.087		1.41		2.886		3.402	0.831			3.173		1.277		2.772		3.631	0.76		86	3319		2427		3226		3304	1399			3423		2223		3159		3511	1304
	2018	205	95	87	3.179	3454		87	3.179		1.392		2.966		3.492	0.831			3.268		1.264		2.744		3.732	0.757		87	3454		2416		3355		3451	1443			3578		2203		3236		3680	1347
	2018	206	96	88	3.262	3572		88	3.262		1.369		3.037		3.576	0.832			3.342		1.259		2.811		3.802	0.765		88	3572		2407		3469		3579	1478			3671		2269		3325		3781	1373
	2018	207	97	89	3.323	3662		89	3.323		1.356		3.083		3.635	0.833			3.405		1.239		2.82		3.862	0.769		89	3662		2442		3555		3679	1508			3765		2288		3404		3884	1403
	2018	208	98	90	3.387	3799		90	3.387		1.339		3.057		3.702	0.831			3.464		1.22		2.803		3.919	0.773		90	3799		2432		3683		3824	1549			3860		2310		3479		3987	1430
	2018	209	99	91	3.45	3945		91	3.45		1.315		3.016		3.775	0.827			3.527		1.196		2.763		3.995	0.772		91	3945		2416		3740		3980	1576			4007		2284		3509		4143	1475
	2018	210	100	92	3.491	4080		92	3.491		1.293		2.976		3.836	0.824			3.571		1.187		2.741		4.067	0.769		92	4080		2408		3798		4124	1605			4188		2263		3522		4325	1500
	2018	211	101	93	3.538	4250		93	3.538		1.276		2.949		3.902	0.82			3.612		1.175		2.723		4.138	0.765		93	4250		2380		3814		4296	1596			4368		2238		3525		4498	1514
	2018	212	102	94	3.567	4433		94	3.567		1.254		2.924		3.968	0.816			3.653		1.163		2.698		4.202	0.763		94	4433		2349		3822		4466	1596			4494		2232		3545		4628	1552
	2018	213	103	95	3.58	4617		95	3.58		1.23		2.886		4.026	0.809			3.675		1.142		2.651		4.26	0.759		95	4617		2317		3822		4637	1585			4655		2211		3548		4778	1567
	2018	214	104	96	3.59	4791		96	3.59		1.208		2.848		4.086	0.803			3.694		1.12		2.589		4.297	0.753		96	4791		2289		3823		4802	1584			4760		2228		3566		4889	1597
	2018	215	105	97	3.556	4964		97	3.556		1.183		2.793		4.138	0.791			3.705		1.097		2.531		4.344	0.745		97	4964		2260		3814		4971	1569			4900		2203		3566		5023	1603
	2018	216	106	98	3.517	5076		98	3.517		1.159		2.735		4.195	0.779			3.656		1.079		2.489		4.399	0.741		98	5076		2234		3807		5105	1570			5030		2178		3562		5184	1598
	2018	217	107	99	3.469	5127		99	3.469		1.135		2.678		4.246	0.767			3.607		1.059		2.445		4.454	0.734		99	5127		2208		3797		5263	1552			5072		2150		3549		5350	1584
	2018	218	108	100	3.446	5193		100	3.446	4.5	1.113	2.5	2.618	4.1	4.287	0.756			3.567	4.2	1.046	2.2	2.415	4.1	4.514	0.731		100	5193	5130.18	2192	2206.64	3799	3806.45	5357	1565			5097	5520.64	2127	2126	3541	4050.36	5502	1576
	2018	219	109	101	3.416	5290		101	3.416		1.092		2.555		4.313	0.745			3.529		1.028		2.375		4.545	0.724		101	5290		2189		3809		5460	1571			5129		2105		3534		5677	1569
	2018	220	110	102	3.375	5335		102	3.375		1.072		2.502		4.348	0.735			3.493		1.008		2.332		4.591	0.714		102	5335		2174		3811		5574	1564			5140		2079		3516		5845	1548
	2018	221	111	103	3.324	5336		103	3.324		1.051		2.451		4.389	0.724			3.437		0.988		2.286		4.623	0.703		103	5336		2153		3799		5722	1545			5147		2056		3502		6006	1536
	2018	222	112	104	3.292	5354		104	3.292		1.035		2.413		4.43	0.719			3.38		0.968		2.241		4.632	0.693		104	5354		2138		3798		5841	1543			5153		2036		3488		6153	1527
	2018	223	113	105	3.306	5349		105	3.306		1.022		2.383		4.45	0.713			3.355		0.95		2.201		4.626	0.682		105	5349		2119		3792		6004	1527			5144		2013		3473		6358	1506
	2018	224	114	106	3.368	5484		106	3.368		1.006		2.436		4.456	0.705			3.398		0.933		2.258		4.617	0.671		106	5484		2101		3912		6167	1521			5285		1990		3593		6552	1490
	2018	225	115	107	3.395	5581		107	3.395		0.987		2.48		4.462	0.694			3.434		0.916		2.319		4.618	0.661		107	5581		2085		4006		6288	1514			5418		1971		3709		6720	1486
	2018	226	116	108	3.424	5724		108	3.424		0.972		2.53		4.465	0.684			3.454		0.899		2.367		4.63	0.651		108	5724		2068		4131		6453	1497			5515		1953		3795		6833	1482
	2018	227	117	109	3.415	5795		109	3.415		0.952		2.549		4.466	0.673			3.462		0.883		2.412		4.61	0.64		109	5795		2058		4202		6553	1498			5653		1934		3917		7018	1465
	2018	228	118	110	3.45	5924		110	3.45		0.935		2.621		4.466	0.662			3.507		0.866		2.491		4.618	0.629		110	5924		2041		4320		6691	1485			5788		1916		4039		7157	1459
	2018	229	119	111	3.472	6066		111	3.472		0.921		2.688		4.466	0.652			3.534		0.85		2.543		4.62	0.619		111	6066		2025		4451		6852	1469			5881		1903		4125		7245	1457
	2018	230	120	112	3.475	6217		112	3.475		0.905		2.697		4.472	0.641			3.543		0.836		2.511		4.588	0.611		112	6217		2008		4567		7000	1456			6038		1890		4201		7431	1449
	2018	231	121	113	3.463	6380		113	3.463		0.893		2.671		4.454	0.634			3.534		0.821		2.494		4.572	0.601		113	6380		1995		4597		7171	1449			6221		1875		4223		7608	1436
	2018	232	122	114	3.456	6547		114	3.456		0.878		2.656		4.452	0.625			3.516		0.807		2.486		4.552	0.592		114	6547		1979		4603		7342	1431			6412		1859		4228		7798	1420
	2018	233	123	115	3.458	6695		115	3.458		0.863		2.642		4.447	0.614			3.501		0.796		2.479		4.529	0.586		115	6695		1964		4605		7499	1415			6595		1843		4222		7983	1404
	2018	234	124	116	3.479	6808		116	3.479		0.849		2.628		4.451	0.604			3.471		0.782		2.462		4.505	0.577		116	6808		1949		4608		7620	1400			6777		1827		4211		8164	1386
	2018	235	125	117	3.475	6947		117	3.475		0.845		2.591		4.453	0.595			3.426		0.769		2.424		4.506	0.568		117	6947		1941		4597		7757	1386			6840		1812		4191		8320	1371
	2018	236	126	118	3.452	7088		118	3.452		0.844		2.546		4.442	0.584			3.392		0.757		2.381		4.501	0.558		118	7088		1933		4577		7912	1372			6852		1797		4165		8481	1355
	2018	237	127	119	3.41	7172		119	3.41		0.843		2.502		4.436	0.575			3.357		0.755		2.334		4.507	0.548		119	7172		1926		4559		8048	1359			6883		1791		4145		8587	1343
	2018	238	128	120	3.37	7216		120	3.37	3.85645	0.843	1.12082	2.459	2.64218	4.435	0.566			3.328	3.55409	0.755	1	2.288	2.57527	4.512	0.538		120	7216	7097	1921	1922.45	4543	4533.27	8161	1348			6894	7396.17	1785	1700	4122	4510.67	8722	1330
	2018	239	129	121	3.338	7226		121	3.338		0.842		2.416		4.434	0.557			3.292		0.755		2.246		4.524	0.529		121	7226		1914		4521		8278	1336			6878		1777		4096		8848	1316
	2018	240	130	122	3.309	7238		122	3.309		0.842		2.371		4.429	0.548			3.236		0.755		2.203		4.53	0.52		122	7238		1908		4498		8351	1326			6857		1771		4071		8955	1304
	2018	241	131	123	3.275	7246		123	3.275		0.842		2.328		4.419	0.54			3.2		0.755		2.166		4.538	0.513		123	7246		1903		4478		8439	1316			6838		1764		4048		9060	1293
	2018	242	132	124	3.247	7221		124	3.247		0.842		2.291		4.419	0.532			3.149		0.755		2.126		4.543	0.505		124	7221		1898		4451		8588	1306			6817		1759		4025		9111	1284
	2018	243	133	125	3.198	7210		125	3.198		0.833		2.25		4.414	0.524			3.092		0.755		2.087		4.538	0.497		125	7210		1890		4429		8644	1297			6793		1754		4002		9228	1274
	2018	244	134	126	3.162	7189		126	3.162		0.825		2.214		4.408	0.516			3.042		0.755		2.052		4.535	0.49		126	7189		1882		4405		8783	1289			6771		1749		3978		9286	1266
	2018	245	135	127	3.12	7170		127	3.12		0.817		2.191		4.4	0.511			2.988		0.747		2.016		4.531			127	7170		1874		4387		8876	1282			6753		1742		3956		9399
	2018	246	136	128	3.06	7141		128	3.06		0.809		2.169		4.39	0.506			2.948		0.739		1.995		4.54			128	7141		1867		4370		9018	1275			6729		1734		3940		9511
	2018	247	137	129	3.023	7124		129	3.023		0.8		2.147		4.384	0.5			2.9		0.732		1.975		4.55			129	7124		1861		4353		9110	1269			6698		1728		3924		9604
	2018	248	138	130	2.988	7111		130	2.988		0.792		2.125		4.376				2.866		0.725		1.956		4.556			130	7111		1854		4339		9176				6680		1721		3909		9731
	2018	249	139	131	3.001	7179		131	3.001		0.785		2.162		4.353				2.882		0.717		2.006		4.559			131	7179		1849		4411		9235				6786		1715		4021		9850
	2018	250	140	132	3.009	7230		132	3.009		0.777		2.196		4.325				2.902		0.71		2.053		4.557			132	7230		1843		4471		9272				6902		1709		4136		9966
	2018	251	141	133	3.022	7348		133	3.022		0.769		2.238		4.292				2.926		0.703		2.103		4.548			133	7348		1838		4575		9383				7021		1704		4243		10061
	2018	252	142	134	3.036	7424		134	3.036		0.761		2.284		4.274				2.949		0.696		2.151		4.542			134	7424		1833	1846.33	4657		9455				7147		1698		4356		10154
	2018	253	143	135	3.051	7529		135	3.051				2.328		4.253				2.973		0.689		2.206		4.535			135	7529				4755		9545				7256		1693		4467		10239
	2018	254	144	136	3.069	7625		136	3.069				2.373		4.245				2.988		0.682		2.172		4.515			136	7625				4849	4619.67	9628				7370		1689	1751.33	4494		10322
	2018	255	145	137	3.083	7733		137	3.083						4.227				3				2.148		4.507			137	7733						9722				7474				4480	4912.67	10407
	2018	256	146	138	3.083	7837		138	3.083						4.217				3.024						4.502			138	7837						9822				7579						10487
	2018	257	147	139	3.08	7931		139	3.08						4.21				3.031						4.484			139	7931	7679.83					9922				7674	8566.67					10561
T2								140		3.54045					4.188					3.01075					4.481			140							10009										10618
	2018	118	1	0	0	0																			4.466																				10674
	2018	119	2	1	0	0																			4.462																				10748
	2018	120	3	2	0	0
	2018	121	4	3	0	0
	2018	122	5	4	0	0
	2018	123	6	5	0	0
	2018	124	7	6	0	0
	2018	125	8	7	0.001	1
	2018	126	9	8	0.002	1
	2018	127	10	9	0.003	2
	2018	128	11	10	0.003	2
	2018	129	12	11	0.004	3
	2018	130	13	12	0.005	3
	2018	131	14	13	0.007	4
	2018	132	15	14	0.008	5
	2018	133	16	15	0.01	6
	2018	134	17	16	0.012	6
	2018	135	18	17	0.013	7
	2018	136	19	18	0.015	8
	2018	137	20	19	0.016	9
	2018	138	21	20	0.018	10
	2018	139	22	21	0.019	11
	2018	140	23	22	0.02	12
	2018	141	24	23	0.022	13
	2018	142	25	24	0.025	15
	2018	143	26	25	0.028	17
	2018	144	27	26	0.03	19
	2018	145	28	27	0.033	21
	2018	146	29	28	0.035	23
	2018	147	30	29	0.04	26
	2018	148	31	30	0.045	29
	2018	149	32	31	0.051	32
	2018	150	33	32	0.059	37
	2018	151	34	33	0.067	41
	2018	152	35	34	0.075	46
	2018	153	36	35	0.086	53
	2018	154	37	36	0.097	60
	2018	155	38	37	0.11	68
	2018	156	39	38	0.124	76
	2018	157	40	39	0.14	87
	2018	158	41	40	0.157	99
	2018	159	42	41	0.176	112
	2018	160	43	42	0.198	124
	2018	161	44	43	0.221	141
	2018	162	45	44	0.245	161
	2018	163	46	45	0.271	181
	2018	164	47	46	0.301	198
	2018	165	48	47	0.334	216
	2018	166	49	48	0.37	237
	2018	167	50	49	0.409	260
	2018	168	51	50	0.444	289
	2018	169	52	51	0.487	317
	2018	170	53	52	0.529	358
	2018	171	54	53	0.576	402
	2018	172	55	54	0.627	450
	2018	173	56	55	0.685	492
	2018	174	57	56	0.742	545
	2018	175	58	57	0.793	613
	2018	176	59	58	0.85	684
	2018	177	60	59	0.852	745
	2018	178	61	60	0.928	793
	2018	179	62	61	1.003	846
	2018	180	63	62	1.079	903
	2018	181	64	63	1.128	975
	2018	182	65	64	1.148	1050
	2018	183	66	65	1.145	1117
	2018	184	67	66	1.207	1183
	2018	185	68	67	1.249	1254
	2018	186	69	68	1.315	1315
	2018	187	70	69	1.311	1408
	2018	188	71	70	1.316	1490
	2018	189	72	71	1.314	1572
	2018	190	73	72	1.325	1649
	2018	191	74	73	1.362	1715
	2018	192	75	74	1.404	1771
	2018	193	76	75	1.439	1835
	2018	194	77	76	1.471	1897
	2018	195	78	77	1.467	1980
	2018	196	79	78	1.463	2046
	2018	197	80	79	1.462	2125
	2018	198	81	80	1.466	2191
	2018	199	82	81	1.459	2252
	2018	200	83	82	1.448	2304
	2018	201	84	83	1.441	2329
	2018	202	85	84	1.433	2350
	2018	203	86	85	1.424	2408
	2018	204	87	86	1.41	2427
	2018	205	88	87	1.392	2416
	2018	206	89	88	1.369	2407
	2018	207	90	89	1.356	2442
	2018	208	91	90	1.339	2432
	2018	209	92	91	1.315	2416
	2018	210	93	92	1.293	2408
	2018	211	94	93	1.276	2380
	2018	212	95	94	1.254	2349
	2018	213	96	95	1.23	2317
	2018	214	97	96	1.208	2289
	2018	215	98	97	1.183	2260
	2018	216	99	98	1.159	2234
	2018	217	100	99	1.135	2208
	2018	218	101	100	1.113	2192
	2018	219	102	101	1.092	2189
	2018	220	103	102	1.072	2174
	2018	221	104	103	1.051	2153
	2018	222	105	104	1.035	2138
	2018	223	106	105	1.022	2119
	2018	224	107	106	1.006	2101
	2018	225	108	107	0.987	2085
	2018	226	109	108	0.972	2068
	2018	227	110	109	0.952	2058
	2018	228	111	110	0.935	2041
	2018	229	112	111	0.921	2025
	2018	230	113	112	0.905	2008
	2018	231	114	113	0.893	1995
	2018	232	115	114	0.878	1979
	2018	233	116	115	0.863	1964
	2018	234	117	116	0.849	1949
	2018	235	118	117	0.845	1941
	2018	236	119	118	0.844	1933
	2018	237	120	119	0.843	1926
	2018	238	121	120	0.843	1921
	2018	239	122	121	0.842	1914
	2018	240	123	122	0.842	1908
	2018	241	124	123	0.842	1903
	2018	242	125	124	0.842	1898
	2018	243	126	125	0.833	1890
	2018	244	127	126	0.825	1882
	2018	245	128	127	0.817	1874
	2018	246	129	128	0.809	1867
	2018	247	130	129	0.8	1861
	2018	248	131	130	0.792	1854
	2018	249	132	131	0.785	1849
	2018	250	133	132	0.777	1843
	2018	251	134	133	0.769	1838
	2018	252	135	134	0.761	1833
T3
	2018	118	1	0	0	0
	2018	119	2	1	0	0
	2018	120	3	2	0	0
	2018	121	4	3	0	0
	2018	122	5	4	0	0
	2018	123	6	5	0	0
	2018	124	7	6	0	0
	2018	125	8	7	0.001	1
	2018	126	9	8	0.002	1
	2018	127	10	9	0.003	2
	2018	128	11	10	0.003	2
	2018	129	12	11	0.004	3
	2018	130	13	12	0.005	3
	2018	131	14	13	0.007	4
	2018	132	15	14	0.008	5
	2018	133	16	15	0.01	6
	2018	134	17	16	0.012	6
	2018	135	18	17	0.013	7
	2018	136	19	18	0.015	8
	2018	137	20	19	0.016	9
	2018	138	21	20	0.018	10
	2018	139	22	21	0.019	11
	2018	140	23	22	0.02	12
	2018	141	24	23	0.022	13
	2018	142	25	24	0.025	15
	2018	143	26	25	0.028	17
	2018	144	27	26	0.03	19
	2018	145	28	27	0.033	21
	2018	146	29	28	0.035	23
	2018	147	30	29	0.04	26
	2018	148	31	30	0.045	29
	2018	149	32	31	0.051	32
	2018	150	33	32	0.059	37
	2018	151	34	33	0.067	41
	2018	152	35	34	0.075	46
	2018	153	36	35	0.086	53
	2018	154	37	36	0.097	60
	2018	155	38	37	0.11	68
	2018	156	39	38	0.124	76
	2018	157	40	39	0.14	87
	2018	158	41	40	0.157	99
	2018	159	42	41	0.176	112
	2018	160	43	42	0.198	124
	2018	161	44	43	0.221	141
	2018	162	45	44	0.245	161
	2018	163	46	45	0.271	181
	2018	164	47	46	0.301	198
	2018	165	48	47	0.334	216
	2018	166	49	48	0.37	237
	2018	167	50	49	0.409	260
	2018	168	51	50	0.444	289
	2018	169	52	51	0.487	317
	2018	170	53	52	0.529	358
	2018	171	54	53	0.576	402
	2018	172	55	54	0.627	450
	2018	173	56	55	0.685	492
	2018	174	57	56	0.744	545
	2018	175	58	57	0.804	606
	2018	176	59	58	0.872	669
	2018	177	60	59	0.943	738
	2018	178	61	60	1.02	790
	2018	179	62	61	1.098	845
	2018	180	63	62	1.183	903
	2018	181	64	63	1.275	977
	2018	182	65	64	1.375	1060
	2018	183	66	65	1.475	1154
	2018	184	67	66	1.579	1232
	2018	185	68	67	1.676	1319
	2018	186	69	68	1.778	1395
	2018	187	70	69	1.879	1515
	2018	188	71	70	1.93	1639
	2018	189	72	71	1.922	1741
	2018	190	73	72	1.933	1848
	2018	191	74	73	2.024	1960
	2018	192	75	74	2.129	2060
	2018	193	76	75	2.205	2164
	2018	194	77	76	2.28	2267
	2018	195	78	77	2.292	2405
	2018	196	79	78	2.292	2535
	2018	197	80	79	2.303	2648
	2018	198	81	80	2.418	2694
	2018	199	82	81	2.483	2741
	2018	200	83	82	2.537	2814
	2018	201	84	83	2.626	2907
	2018	202	85	84	2.721	3032
	2018	203	86	85	2.8	3123
	2018	204	87	86	2.886	3226
	2018	205	88	87	2.966	3355
	2018	206	89	88	3.037	3469
	2018	207	90	89	3.083	3555
	2018	208	91	90	3.057	3683
	2018	209	92	91	3.016	3740
	2018	210	93	92	2.976	3798
	2018	211	94	93	2.949	3814
	2018	212	95	94	2.924	3822
	2018	213	96	95	2.886	3822
	2018	214	97	96	2.848	3823
	2018	215	98	97	2.793	3814
	2018	216	99	98	2.735	3807
	2018	217	100	99	2.678	3797
	2018	218	101	100	2.618	3799
	2018	219	102	101	2.555	3809
	2018	220	103	102	2.502	3811
	2018	221	104	103	2.451	3799
	2018	222	105	104	2.413	3798
	2018	223	106	105	2.383	3792
	2018	224	107	106	2.436	3912
	2018	225	108	107	2.48	4006
	2018	226	109	108	2.53	4131
	2018	227	110	109	2.549	4202
	2018	228	111	110	2.621	4320
	2018	229	112	111	2.688	4451
	2018	230	113	112	2.697	4567
	2018	231	114	113	2.671	4597
	2018	232	115	114	2.656	4603
	2018	233	116	115	2.642	4605
	2018	234	117	116	2.628	4608
	2018	235	118	117	2.591	4597
	2018	236	119	118	2.546	4577
	2018	237	120	119	2.502	4559
	2018	238	121	120	2.459	4543
	2018	239	122	121	2.416	4521
	2018	240	123	122	2.371	4498
	2018	241	124	123	2.328	4478
	2018	242	125	124	2.291	4451
	2018	243	126	125	2.25	4429
	2018	244	127	126	2.214	4405
	2018	245	128	127	2.191	4387
	2018	246	129	128	2.169	4370
	2018	247	130	129	2.147	4353
	2018	248	131	130	2.125	4339
	2018	249	132	131	2.162	4411
	2018	250	133	132	2.196	4471
	2018	251	134	133	2.238	4575
	2018	252	135	134	2.284	4657
	2018	253	136	135	2.328	4755
	2018	254	137	136	2.373	4849
T4
	2018	118	1	0	0	0
	2018	119	2	1	0	0
	2018	120	3	2	0	0
	2018	121	4	3	0	0
	2018	122	5	4	0	0
	2018	123	6	5	0	0
	2018	124	7	6	0	0
	2018	125	8	7	0.001	1
	2018	126	9	8	0.002	1
	2018	127	10	9	0.003	2
	2018	128	11	10	0.003	2
	2018	129	12	11	0.004	3
	2018	130	13	12	0.005	3
	2018	131	14	13	0.007	4
	2018	132	15	14	0.008	5
	2018	133	16	15	0.01	6
	2018	134	17	16	0.012	6
	2018	135	18	17	0.013	7
	2018	136	19	18	0.015	8
	2018	137	20	19	0.016	9
	2018	138	21	20	0.018	10
	2018	139	22	21	0.019	11
	2018	140	23	22	0.02	12
	2018	141	24	23	0.022	13
	2018	142	25	24	0.025	15
	2018	143	26	25	0.028	17
	2018	144	27	26	0.03	19
	2018	145	28	27	0.033	21
	2018	146	29	28	0.035	23
	2018	147	30	29	0.04	26
	2018	148	31	30	0.045	29
	2018	149	32	31	0.051	32
	2018	150	33	32	0.059	37
	2018	151	34	33	0.067	41
	2018	152	35	34	0.075	46
	2018	153	36	35	0.086	53
	2018	154	37	36	0.096	61
	2018	155	38	37	0.108	69
	2018	156	39	38	0.12	78
	2018	157	40	39	0.133	89
	2018	158	41	40	0.145	102
	2018	159	42	41	0.157	114
	2018	160	43	42	0.176	124
	2018	161	44	43	0.187	140
	2018	162	45	44	0.202	149
	2018	163	46	45	0.219	161
	2018	164	47	46	0.236	171
	2018	165	48	47	0.26	184
	2018	166	49	48	0.288	199
	2018	167	50	49	0.319	217
	2018	168	51	50	0.347	239
	2018	169	52	51	0.383	262
	2018	170	53	52	0.417	294
	2018	171	54	53	0.455	330
	2018	172	55	54	0.497	368
	2018	173	56	55	0.545	402
	2018	174	57	56	0.594	446
	2018	175	58	57	0.644	496
	2018	176	59	58	0.701	549
	2018	177	60	59	0.761	606
	2018	178	61	60	0.827	650
	2018	179	62	61	0.894	697
	2018	180	63	62	0.967	747
	2018	181	64	63	1.047	810
	2018	182	65	64	1.133	882
	2018	183	66	65	1.222	963
	2018	184	67	66	1.313	1032
	2018	185	68	67	1.398	1108
	2018	186	69	68	1.489	1176
	2018	187	70	69	1.589	1279
	2018	188	71	70	1.692	1387
	2018	189	72	71	1.796	1502
	2018	190	73	72	1.909	1612
	2018	191	74	73	2.027	1714
	2018	192	75	74	2.136	1803
	2018	193	76	75	2.25	1904
	2018	194	77	76	2.364	2004
	2018	195	78	77	2.477	2142
	2018	196	79	78	2.585	2285
	2018	197	80	79	2.7	2416
	2018	198	81	80	2.816	2543
	2018	199	82	81	2.928	2667
	2018	200	83	82	3.036	2796
	2018	201	84	83	3.139	2921
	2018	202	85	84	3.239	3073
	2018	203	86	85	3.32	3185
	2018	204	87	86	3.402	3304
	2018	205	88	87	3.492	3451
	2018	206	89	88	3.576	3579
	2018	207	90	89	3.635	3679
	2018	208	91	90	3.702	3824
	2018	209	92	91	3.775	3980
	2018	210	93	92	3.836	4124
	2018	211	94	93	3.902	4296
	2018	212	95	94	3.968	4466
	2018	213	96	95	4.026	4637
	2018	214	97	96	4.086	4802
	2018	215	98	97	4.138	4971
	2018	216	99	98	4.195	5105
	2018	217	100	99	4.246	5263
	2018	218	101	100	4.287	5357
	2018	219	102	101	4.313	5460
	2018	220	103	102	4.348	5574
	2018	221	104	103	4.389	5722
	2018	222	105	104	4.43	5841
	2018	223	106	105	4.45	6004
	2018	224	107	106	4.456	6167
	2018	225	108	107	4.462	6288
	2018	226	109	108	4.465	6453
	2018	227	110	109	4.466	6553
	2018	228	111	110	4.466	6691
	2018	229	112	111	4.466	6852
	2018	230	113	112	4.472	7000
	2018	231	114	113	4.454	7171
	2018	232	115	114	4.452	7342
	2018	233	116	115	4.447	7499
	2018	234	117	116	4.451	7620
	2018	235	118	117	4.453	7757
	2018	236	119	118	4.442	7912
	2018	237	120	119	4.436	8048
	2018	238	121	120	4.435	8161
	2018	239	122	121	4.434	8278
	2018	240	123	122	4.429	8351
	2018	241	124	123	4.419	8439
	2018	242	125	124	4.419	8588
	2018	243	126	125	4.414	8644
	2018	244	127	126	4.408	8783
	2018	245	128	127	4.4	8876
	2018	246	129	128	4.39	9018
	2018	247	130	129	4.384	9110
	2018	248	131	130	4.376	9176
	2018	249	132	131	4.353	9235
	2018	250	133	132	4.325	9272
	2018	251	134	133	4.292	9383
	2018	252	135	134	4.274	9455
	2018	253	136	135	4.253	9545
	2018	254	137	136	4.245	9628
	2018	255	138	137	4.227	9722
	2018	256	139	138	4.217	9822
	2018	257	140	139	4.21	9922
	2018	258	141	140	4.188	10009
T5
	2018	118	1	0	0	0
	2018	119	2	1	0	0
	2018	120	3	2	0	0
	2018	121	4	3	0	0
	2018	122	5	4	0	0
	2018	123	6	5	0	0
	2018	124	7	6	0	0
	2018	125	8	7	0.001	1
	2018	126	9	8	0.002	1
	2018	127	10	9	0.003	2
	2018	128	11	10	0.003	2
	2018	129	12	11	0.004	3
	2018	130	13	12	0.005	3
	2018	131	14	13	0.007	4
	2018	132	15	14	0.008	5
	2018	133	16	15	0.01	6
	2018	134	17	16	0.012	6
	2018	135	18	17	0.013	7
	2018	136	19	18	0.015	8
	2018	137	20	19	0.016	9
	2018	138	21	20	0.018	10
	2018	139	22	21	0.019	11
	2018	140	23	22	0.02	12
	2018	141	24	23	0.022	13
	2018	142	25	24	0.025	15
	2018	143	26	25	0.028	17
	2018	144	27	26	0.03	19
	2018	145	28	27	0.033	21
	2018	146	29	28	0.035	23
	2018	147	30	29	0.04	26
	2018	148	31	30	0.045	29
	2018	149	32	31	0.051	32
	2018	150	33	32	0.059	37
	2018	151	34	33	0.067	41
	2018	152	35	34	0.075	46
	2018	153	36	35	0.086	53
	2018	154	37	36	0.096	61
	2018	155	38	37	0.108	69
	2018	156	39	38	0.12	78
	2018	157	40	39	0.133	89
	2018	158	41	40	0.145	102
	2018	159	42	41	0.157	114
	2018	160	43	42	0.176	124
	2018	161	44	43	0.187	140
	2018	162	45	44	0.2	157
	2018	163	46	45	0.213	173
	2018	164	47	46	0.235	185
	2018	165	48	47	0.258	200
	2018	166	49	48	0.28	216
	2018	167	50	49	0.302	234
	2018	168	51	50	0.32	255
	2018	169	52	51	0.34	275
	2018	170	53	52	0.353	301
	2018	171	54	53	0.365	327
	2018	172	55	54	0.372	353
	2018	173	56	55	0.395	376
	2018	174	57	56	0.407	404
	2018	175	58	57	0.407	424
	2018	176	59	58	0.407	451
	2018	177	60	59	0.407	473
	2018	178	61	60	0.436	496
	2018	179	62	61	0.462	519
	2018	180	63	62	0.493	544
	2018	181	64	63	0.513	575
	2018	182	65	64	0.531	606
	2018	183	66	65	0.536	640
	2018	184	67	66	0.562	667
	2018	185	68	67	0.584	698
	2018	186	69	68	0.609	725
	2018	187	70	69	0.615	766
	2018	188	71	70	0.622	804
	2018	189	72	71	0.626	843
	2018	190	73	72	0.637	880
	2018	191	74	73	0.659	912
	2018	192	75	74	0.685	941
	2018	193	76	75	0.707	974
	2018	194	77	76	0.73	1006
	2018	195	78	77	0.743	1050
	2018	196	79	78	0.753	1093
	2018	197	80	79	0.767	1132
	2018	198	81	80	0.783	1168
	2018	199	82	81	0.795	1206
	2018	200	83	82	0.807	1244
	2018	201	84	83	0.817	1283
	2018	202	85	84	0.82	1329
	2018	203	86	85	0.826	1363
	2018	204	87	86	0.831	1399
	2018	205	88	87	0.831	1443
	2018	206	89	88	0.832	1478
	2018	207	90	89	0.833	1508
	2018	208	91	90	0.831	1549
	2018	209	92	91	0.827	1576
	2018	210	93	92	0.824	1605
	2018	211	94	93	0.82	1596
	2018	212	95	94	0.816	1596
	2018	213	96	95	0.809	1585
	2018	214	97	96	0.803	1584
	2018	215	98	97	0.791	1569
	2018	216	99	98	0.779	1570
	2018	217	100	99	0.767	1552
	2018	218	101	100	0.756	1565
	2018	219	102	101	0.745	1571
	2018	220	103	102	0.735	1564
	2018	221	104	103	0.724	1545
	2018	222	105	104	0.719	1543
	2018	223	106	105	0.713	1527
	2018	224	107	106	0.705	1521
	2018	225	108	107	0.694	1514
	2018	226	109	108	0.684	1497
	2018	227	110	109	0.673	1498
	2018	228	111	110	0.662	1485
	2018	229	112	111	0.652	1469
	2018	230	113	112	0.641	1456
	2018	231	114	113	0.634	1449
	2018	232	115	114	0.625	1431
	2018	233	116	115	0.614	1415
	2018	234	117	116	0.604	1400
	2018	235	118	117	0.595	1386
	2018	236	119	118	0.584	1372
	2018	237	120	119	0.575	1359
	2018	238	121	120	0.566	1348
	2018	239	122	121	0.557	1336
	2018	240	123	122	0.548	1326
	2018	241	124	123	0.54	1316
	2018	242	125	124	0.532	1306
	2018	243	126	125	0.524	1297
	2018	244	127	126	0.516	1289
	2018	245	128	127	0.511	1282
	2018	246	129	128	0.506	1275
	2018	247	130	129	0.5	1269
	2018	248	131	130	0.495	1263
	2018	249	132	131	0.49	1257
	2018	250	133	132	0.485	1252
	2018	251	134	133	0.48	1247
	2018	252	135	134	0.475	1242
	2018	253	136	135	0.471	1237
	2018	254	137	136	0.466	1233
T1
	2019	118	8	0	0	0
	2019	119	9	1	0	0
	2019	120	10	2	0	0
	2019	121	11	3	0	0
	2019	122	12	4	0	0
	2019	123	13	5	0	0
	2019	124	14	6	0	0
	2019	125	15	7	0.001	1
	2019	126	16	8	0.002	2
	2019	127	17	9	0.003	3
	2019	128	18	10	0.003	3
	2019	129	19	11	0.004	4
	2019	130	20	12	0.005	4
	2019	131	21	13	0.006	5
	2019	132	22	14	0.008	5
	2019	133	23	15	0.01	6
	2019	134	24	16	0.011	7
	2019	135	25	17	0.013	8
	2019	136	26	18	0.014	9
	2019	137	27	19	0.016	9
	2019	138	28	20	0.017	11
	2019	139	29	21	0.018	12
	2019	140	30	22	0.02	13
	2019	141	31	23	0.021	14
	2019	142	32	24	0.024	16
	2019	143	33	25	0.027	18
	2019	144	34	26	0.029	20
	2019	145	35	27	0.032	22
	2019	146	36	28	0.035	24
	2019	147	37	29	0.04	28
	2019	148	38	30	0.045	31
	2019	149	39	31	0.052	35
	2019	150	40	32	0.059	40
	2019	151	41	33	0.066	44
	2019	152	42	34	0.073	49
	2019	153	43	35	0.082	54
	2019	154	44	36	0.092	61
	2019	155	45	37	0.105	69
	2019	156	46	38	0.118	78
	2019	157	47	39	0.132	89
	2019	158	48	40	0.148	101
	2019	159	49	41	0.165	114
	2019	160	50	42	0.183	128
	2019	161	51	43	0.202	142
	2019	162	52	44	0.223	159
	2019	163	53	45	0.249	178
	2019	164	54	46	0.277	202
	2019	165	55	47	0.309	227
	2019	166	56	48	0.34	255
	2019	167	57	49	0.379	286
	2019	168	58	50	0.42	321
	2019	169	59	51	0.461	353
	2019	170	60	52	0.508	394
	2019	171	61	53	0.561	437
	2019	172	62	54	0.612	490
	2019	173	63	55	0.668	544
	2019	174	64	56	0.73	603
	2019	175	65	57	0.797	646
	2019	176	66	58	0.869	711
	2019	177	67	59	0.943	782
	2019	178	68	60	1.026	854
	2019	179	69	61	1.108	935
	2019	180	70	62	1.194	1018
	2019	181	71	63	1.289	1106
	2019	182	72	64	1.386	1196
	2019	183	73	65	1.483	1300
	2019	184	74	66	1.587	1411
	2019	185	75	67	1.63	1503
	2019	186	76	68	1.644	1610
	2019	187	77	69	1.762	1686
	2019	188	78	70	1.791	1812
	2019	189	79	71	1.823	1928
	2019	190	80	72	1.899	2046
	2019	191	81	73	2.016	2124
	2019	192	82	74	2.126	2207
	2019	193	83	75	2.228	2293
	2019	194	84	76	2.273	2416
	2019	195	85	77	2.359	2498
	2019	196	86	78	2.431	2584
	2019	197	87	79	2.485	2673
	2019	198	88	80	2.634	2761
	2019	199	89	81	2.706	2836
	2019	200	90	82	2.774	2931
	2019	201	91	83	2.878	3051
	2019	202	92	84	2.965	3127
	2019	203	93	85	3.071	3279
	2019	204	94	86	3.173	3423
	2019	205	95	87	3.268	3578
	2019	206	96	88	3.342	3671
	2019	207	97	89	3.405	3765
	2019	208	98	90	3.464	3860
	2019	209	99	91	3.527	4007
	2019	210	100	92	3.571	4188
	2019	211	101	93	3.612	4368
	2019	212	102	94	3.653	4494
	2019	213	103	95	3.675	4655
	2019	214	104	96	3.694	4760
	2019	215	105	97	3.705	4900
	2019	216	106	98	3.656	5030
	2019	217	107	99	3.607	5072
	2019	218	108	100	3.567	5097
	2019	219	109	101	3.529	5129
	2019	220	110	102	3.493	5140
	2019	221	111	103	3.437	5147
	2019	222	112	104	3.38	5153
	2019	223	113	105	3.355	5144
	2019	224	114	106	3.398	5285
	2019	225	115	107	3.434	5418
	2019	226	116	108	3.454	5515
	2019	227	117	109	3.462	5653
	2019	228	118	110	3.507	5788
	2019	229	119	111	3.534	5881
	2019	230	120	112	3.543	6038
	2019	231	121	113	3.534	6221
	2019	232	122	114	3.516	6412
	2019	233	123	115	3.501	6595
	2019	234	124	116	3.471	6777
	2019	235	125	117	3.426	6840
	2019	236	126	118	3.392	6852
	2019	237	127	119	3.357	6883
	2019	238	128	120	3.328	6894
	2019	239	129	121	3.292	6878
	2019	240	130	122	3.236	6857
	2019	241	131	123	3.2	6838
	2019	242	132	124	3.149	6817
	2019	243	133	125	3.092	6793
	2019	244	134	126	3.042	6771
	2019	245	135	127	2.988	6753
	2019	246	136	128	2.948	6729
	2019	247	137	129	2.9	6698
	2019	248	138	130	2.866	6680
	2019	249	139	131	2.882	6786
	2019	250	140	132	2.902	6902
	2019	251	141	133	2.926	7021
	2019	252	142	134	2.949	7147
	2019	253	143	135	2.973	7256
	2019	254	144	136	2.988	7370
	2019	255	145	137	3	7474
	2019	256	146	138	3.024	7579
	2019	257	147	139	3.031	7674
T2
	2019	118	1	0	0	0
	2019	119	2	1	0	0
	2019	120	3	2	0	0
	2019	121	4	3	0	0
	2019	122	5	4	0	0
	2019	123	6	5	0	0
	2019	124	7	6	0	0
	2019	125	8	7	0.001	1
	2019	126	9	8	0.002	2
	2019	127	10	9	0.003	3
	2019	128	11	10	0.003	3
	2019	129	12	11	0.004	4
	2019	130	13	12	0.005	4
	2019	131	14	13	0.006	5
	2019	132	15	14	0.008	5
	2019	133	16	15	0.01	6
	2019	134	17	16	0.011	7
	2019	135	18	17	0.013	8
	2019	136	19	18	0.015	9
	2019	137	20	19	0.016	9
	2019	138	21	20	0.017	10
	2019	139	22	21	0.018	12
	2019	140	23	22	0.02	13
	2019	141	24	23	0.021	14
	2019	142	25	24	0.023	16
	2019	143	26	25	0.027	18
	2019	144	27	26	0.029	20
	2019	145	28	27	0.032	22
	2019	146	29	28	0.035	24
	2019	147	30	29	0.04	28
	2019	148	31	30	0.045	31
	2019	149	32	31	0.052	35
	2019	150	33	32	0.058	40
	2019	151	34	33	0.066	44
	2019	152	35	34	0.073	49
	2019	153	36	35	0.082	54
	2019	154	37	36	0.092	61
	2019	155	38	37	0.105	69
	2019	156	39	38	0.118	78
	2019	157	40	39	0.133	89
	2019	158	41	40	0.149	101
	2019	159	42	41	0.165	114
	2019	160	43	42	0.184	128
	2019	161	44	43	0.202	142
	2019	162	45	44	0.224	159
	2019	163	46	45	0.249	178
	2019	164	47	46	0.278	202
	2019	165	48	47	0.309	227
	2019	166	49	48	0.341	255
	2019	167	50	49	0.38	286
	2019	168	51	50	0.421	321
	2019	169	52	51	0.461	354
	2019	170	53	52	0.509	395
	2019	171	54	53	0.562	437
	2019	172	55	54	0.612	490
	2019	173	56	55	0.665	548
	2019	174	57	56	0.714	613
	2019	175	58	57	0.781	656
	2019	176	59	58	0.813	724
	2019	177	60	59	0.811	759
	2019	178	61	60	0.826	822
	2019	179	62	61	0.824	850
	2019	180	63	62	0.823	884
	2019	181	64	63	0.825	948
	2019	182	65	64	0.83	1008
	2019	183	66	65	0.845	1082
	2019	184	67	66	0.853	1147
	2019	185	68	67	0.88	1212
	2019	186	69	68	0.907	1282
	2019	187	70	69	0.968	1328
	2019	188	71	70	0.991	1408
	2019	189	72	71	1.01	1471
	2019	190	73	72	1.04	1537
	2019	191	74	73	1.091	1578
	2019	192	75	74	1.138	1622
	2019	193	76	75	1.182	1667
	2019	194	77	76	1.194	1743
	2019	195	78	77	1.236	1784
	2019	196	79	78	1.266	1834
	2019	197	80	79	1.293	1882
	2019	198	81	80	1.291	1972
	2019	199	82	81	1.289	2043
	2019	200	83	82	1.291	2111
	2019	201	84	83	1.286	2159
	2019	202	85	84	1.291	2202
	2019	203	86	85	1.284	2204
	2019	204	87	86	1.277	2223
	2019	205	88	87	1.264	2203
	2019	206	89	88	1.259	2269
	2019	207	90	89	1.239	2288
	2019	208	91	90	1.22	2310
	2019	209	92	91	1.196	2284
	2019	210	93	92	1.187	2263
	2019	211	94	93	1.175	2238
	2019	212	95	94	1.163	2232
	2019	213	96	95	1.142	2211
	2019	214	97	96	1.12	2228
	2019	215	98	97	1.097	2203
	2019	216	99	98	1.079	2178
	2019	217	100	99	1.059	2150
	2019	218	101	100	1.046	2127
	2019	219	102	101	1.028	2105
	2019	220	103	102	1.008	2079
	2019	221	104	103	0.988	2056
	2019	222	105	104	0.968	2036
	2019	223	106	105	0.95	2013
	2019	224	107	106	0.933	1990
	2019	225	108	107	0.916	1971
	2019	226	109	108	0.899	1953
	2019	227	110	109	0.883	1934
	2019	228	111	110	0.866	1916
	2019	229	112	111	0.85	1903
	2019	230	113	112	0.836	1890
	2019	231	114	113	0.821	1875
	2019	232	115	114	0.807	1859
	2019	233	116	115	0.796	1843
	2019	234	117	116	0.782	1827
	2019	235	118	117	0.769	1812
	2019	236	119	118	0.757	1797
	2019	237	120	119	0.755	1791
	2019	238	121	120	0.755	1785
	2019	239	122	121	0.755	1777
	2019	240	123	122	0.755	1771
	2019	241	124	123	0.755	1764
	2019	242	125	124	0.755	1759
	2019	243	126	125	0.755	1754
	2019	244	127	126	0.755	1749
	2019	245	128	127	0.747	1742
	2019	246	129	128	0.739	1734
	2019	247	130	129	0.732	1728
	2019	248	131	130	0.725	1721
	2019	249	132	131	0.717	1715
	2019	250	133	132	0.71	1709
	2019	251	134	133	0.703	1704
	2019	252	135	134	0.696	1698
	2019	253	136	135	0.689	1693
	2019	254	137	136	0.682	1689
T3
	2019	118	1	0	0	0
	2019	119	2	1	0	0
	2019	120	3	2	0	0
	2019	121	4	3	0	0
	2019	122	5	4	0	0
	2019	123	6	5	0	0
	2019	124	7	6	0	0
	2019	125	8	7	0.001	1
	2019	126	9	8	0.002	2
	2019	127	10	9	0.003	3
	2019	128	11	10	0.003	3
	2019	129	12	11	0.004	4
	2019	130	13	12	0.005	4
	2019	131	14	13	0.006	5
	2019	132	15	14	0.008	5
	2019	133	16	15	0.01	6
	2019	134	17	16	0.011	7
	2019	135	18	17	0.013	8
	2019	136	19	18	0.015	9
	2019	137	20	19	0.016	9
	2019	138	21	20	0.017	10
	2019	139	22	21	0.018	12
	2019	140	23	22	0.02	13
	2019	141	24	23	0.021	14
	2019	142	25	24	0.023	16
	2019	143	26	25	0.027	18
	2019	144	27	26	0.029	20
	2019	145	28	27	0.032	22
	2019	146	29	28	0.035	24
	2019	147	30	29	0.04	28
	2019	148	31	30	0.045	31
	2019	149	32	31	0.052	35
	2019	150	33	32	0.058	40
	2019	151	34	33	0.066	44
	2019	152	35	34	0.073	49
	2019	153	36	35	0.082	54
	2019	154	37	36	0.092	61
	2019	155	38	37	0.105	69
	2019	156	39	38	0.118	78
	2019	157	40	39	0.133	89
	2019	158	41	40	0.149	101
	2019	159	42	41	0.165	114
	2019	160	43	42	0.184	128
	2019	161	44	43	0.202	142
	2019	162	45	44	0.224	159
	2019	163	46	45	0.249	178
	2019	164	47	46	0.278	202
	2019	165	48	47	0.309	227
	2019	166	49	48	0.341	255
	2019	167	50	49	0.38	286
	2019	168	51	50	0.421	321
	2019	169	52	51	0.461	354
	2019	170	53	52	0.509	395
	2019	171	54	53	0.562	437
	2019	172	55	54	0.613	491
	2019	173	56	55	0.669	544
	2019	174	57	56	0.731	603
	2019	175	58	57	0.798	646
	2019	176	59	58	0.87	711
	2019	177	60	59	0.943	782
	2019	178	61	60	1.026	854
	2019	179	62	61	1.109	935
	2019	180	63	62	1.195	1018
	2019	181	64	63	1.289	1106
	2019	182	65	64	1.382	1196
	2019	183	66	65	1.419	1287
	2019	184	67	66	1.415	1343
	2019	185	68	67	1.433	1427
	2019	186	69	68	1.451	1532
	2019	187	70	69	1.57	1606
	2019	188	71	70	1.604	1723
	2019	189	72	71	1.65	1830
	2019	190	73	72	1.704	1939
	2019	191	74	73	1.807	2013
	2019	192	75	74	1.897	2089
	2019	193	76	75	1.978	2165
	2019	194	77	76	1.991	2284
	2019	195	78	77	2.055	2353
	2019	196	79	78	2.11	2431
	2019	197	80	79	2.147	2511
	2019	198	81	80	2.26	2568
	2019	199	82	81	2.351	2636
	2019	200	83	82	2.402	2708
	2019	201	84	83	2.496	2814
	2019	202	85	84	2.581	2882
	2019	203	86	85	2.683	3023
	2019	204	87	86	2.772	3159
	2019	205	88	87	2.744	3236
	2019	206	89	88	2.811	3325
	2019	207	90	89	2.82	3404
	2019	208	91	90	2.803	3479
	2019	209	92	91	2.763	3509
	2019	210	93	92	2.741	3522
	2019	211	94	93	2.723	3525
	2019	212	95	94	2.698	3545
	2019	213	96	95	2.651	3548
	2019	214	97	96	2.589	3566
	2019	215	98	97	2.531	3566
	2019	216	99	98	2.489	3562
	2019	217	100	99	2.445	3549
	2019	218	101	100	2.415	3541
	2019	219	102	101	2.375	3534
	2019	220	103	102	2.332	3516
	2019	221	104	103	2.286	3502
	2019	222	105	104	2.241	3488
	2019	223	106	105	2.201	3473
	2019	224	107	106	2.258	3593
	2019	225	108	107	2.319	3709
	2019	226	109	108	2.367	3795
	2019	227	110	109	2.412	3917
	2019	228	111	110	2.491	4039
	2019	229	112	111	2.543	4125
	2019	230	113	112	2.511	4201
	2019	231	114	113	2.494	4223
	2019	232	115	114	2.486	4228
	2019	233	116	115	2.479	4222
	2019	234	117	116	2.462	4211
	2019	235	118	117	2.424	4191
	2019	236	119	118	2.381	4165
	2019	237	120	119	2.334	4145
	2019	238	121	120	2.288	4122
	2019	239	122	121	2.246	4096
	2019	240	123	122	2.203	4071
	2019	241	124	123	2.166	4048
	2019	242	125	124	2.126	4025
	2019	243	126	125	2.087	4002
	2019	244	127	126	2.052	3978
	2019	245	128	127	2.016	3956
	2019	246	129	128	1.995	3940
	2019	247	130	129	1.975	3924
	2019	248	131	130	1.956	3909
	2019	249	132	131	2.006	4021
	2019	250	133	132	2.053	4136
	2019	251	134	133	2.103	4243
	2019	252	135	134	2.151	4356
	2019	253	136	135	2.206	4467
	2019	254	137	136	2.172	4494
	2019	255	138	137	2.148	4480
T4
	2019	118	1	0	0	0
	2019	119	2	1	0	0
	2019	120	3	2	0	0
	2019	121	4	3	0	0
	2019	122	5	4	0	0
	2019	123	6	5	0	0
	2019	124	7	6	0	0
	2019	125	8	7	0.001	1
	2019	126	9	8	0.002	2
	2019	127	10	9	0.003	3
	2019	128	11	10	0.003	3
	2019	129	12	11	0.004	4
	2019	130	13	12	0.005	4
	2019	131	14	13	0.006	5
	2019	132	15	14	0.008	5
	2019	133	16	15	0.01	6
	2019	134	17	16	0.011	7
	2019	135	18	17	0.013	8
	2019	136	19	18	0.015	9
	2019	137	20	19	0.016	9
	2019	138	21	20	0.017	10
	2019	139	22	21	0.018	12
	2019	140	23	22	0.02	13
	2019	141	24	23	0.021	14
	2019	142	25	24	0.023	16
	2019	143	26	25	0.027	18
	2019	144	27	26	0.029	20
	2019	145	28	27	0.032	22
	2019	146	29	28	0.035	24
	2019	147	30	29	0.04	28
	2019	148	31	30	0.045	31
	2019	149	32	31	0.052	35
	2019	150	33	32	0.058	40
	2019	151	34	33	0.066	44
	2019	152	35	34	0.073	49
	2019	153	36	35	0.082	54
	2019	154	37	36	0.093	61
	2019	155	38	37	0.104	70
	2019	156	39	38	0.115	80
	2019	157	40	39	0.127	91
	2019	158	41	40	0.138	104
	2019	159	42	41	0.147	117
	2019	160	43	42	0.159	130
	2019	161	44	43	0.168	136
	2019	162	45	44	0.184	147
	2019	163	46	45	0.201	160
	2019	164	47	46	0.223	178
	2019	165	48	47	0.249	198
	2019	166	49	48	0.275	221
	2019	167	50	49	0.308	246
	2019	168	51	50	0.342	275
	2019	169	52	51	0.377	302
	2019	170	53	52	0.417	336
	2019	171	54	53	0.463	372
	2019	172	55	54	0.507	415
	2019	173	56	55	0.555	462
	2019	174	57	56	0.608	512
	2019	175	58	57	0.667	549
	2019	176	59	58	0.73	605
	2019	177	60	59	0.795	668
	2019	178	61	60	0.869	731
	2019	179	62	61	0.942	802
	2019	180	63	62	1.019	876
	2019	181	64	63	1.104	955
	2019	182	65	64	1.192	1036
	2019	183	66	65	1.284	1129
	2019	184	67	66	1.382	1223
	2019	185	68	67	1.488	1317
	2019	186	69	68	1.598	1425
	2019	187	70	69	1.707	1498
	2019	188	71	70	1.826	1614
	2019	189	72	71	1.949	1727
	2019	190	73	72	2.076	1844
	2019	191	74	73	2.192	1924
	2019	192	75	74	2.308	2004
	2019	193	76	75	2.42	2087
	2019	194	77	76	2.542	2215
	2019	195	78	77	2.657	2305
	2019	196	79	78	2.768	2399
	2019	197	80	79	2.87	2496
	2019	198	81	80	2.974	2651
	2019	199	82	81	3.095	2803
	2019	200	83	82	3.214	2946
	2019	201	84	83	3.333	3092
	2019	202	85	84	3.424	3185
	2019	203	86	85	3.529	3353
	2019	204	87	86	3.631	3511
	2019	205	88	87	3.732	3680
	2019	206	89	88	3.802	3781
	2019	207	90	89	3.862	3884
	2019	208	91	90	3.919	3987
	2019	209	92	91	3.995	4143
	2019	210	93	92	4.067	4325
	2019	211	94	93	4.138	4498
	2019	212	95	94	4.202	4628
	2019	213	96	95	4.26	4778
	2019	214	97	96	4.297	4889
	2019	215	98	97	4.344	5023
	2019	216	99	98	4.399	5184
	2019	217	100	99	4.454	5350
	2019	218	101	100	4.514	5502
	2019	219	102	101	4.545	5677
	2019	220	103	102	4.591	5845
	2019	221	104	103	4.623	6006
	2019	222	105	104	4.632	6153
	2019	223	106	105	4.626	6358
	2019	224	107	106	4.617	6552
	2019	225	108	107	4.618	6720
	2019	226	109	108	4.63	6833
	2019	227	110	109	4.61	7018
	2019	228	111	110	4.618	7157
	2019	229	112	111	4.62	7245
	2019	230	113	112	4.588	7431
	2019	231	114	113	4.572	7608
	2019	232	115	114	4.552	7798
	2019	233	116	115	4.529	7983
	2019	234	117	116	4.505	8164
	2019	235	118	117	4.506	8320
	2019	236	119	118	4.501	8481
	2019	237	120	119	4.507	8587
	2019	238	121	120	4.512	8722
	2019	239	122	121	4.524	8848
	2019	240	123	122	4.53	8955
	2019	241	124	123	4.538	9060
	2019	242	125	124	4.543	9111
	2019	243	126	125	4.538	9228
	2019	244	127	126	4.535	9286
	2019	245	128	127	4.531	9399
	2019	246	129	128	4.54	9511
	2019	247	130	129	4.55	9604
	2019	248	131	130	4.556	9731
	2019	249	132	131	4.559	9850
	2019	250	133	132	4.557	9966
	2019	251	134	133	4.548	10061
	2019	252	135	134	4.542	10154
	2019	253	136	135	4.535	10239
	2019	254	137	136	4.515	10322
	2019	255	138	137	4.507	10407
	2019	256	139	138	4.502	10487
	2019	257	140	139	4.484	10561
	2019	258	141	140	4.481	10618
	2019	259	142	141	4.466	10674
	2019	260	143	142	4.462	10748
T5
	2019	118	1	0	0	0
	2019	119	2	1	0	0
	2019	120	3	2	0	0
	2019	121	4	3	0	0
	2019	122	5	4	0	0
	2019	123	6	5	0	0
	2019	124	7	6	0	0
	2019	125	8	7	0.001	1
	2019	126	9	8	0.002	2
	2019	127	10	9	0.003	3
	2019	128	11	10	0.003	3
	2019	129	12	11	0.004	4
	2019	130	13	12	0.005	4
	2019	131	14	13	0.006	5
	2019	132	15	14	0.008	5
	2019	133	16	15	0.01	6
	2019	134	17	16	0.011	7
	2019	135	18	17	0.013	8
	2019	136	19	18	0.015	9
	2019	137	20	19	0.016	9
	2019	138	21	20	0.017	10
	2019	139	22	21	0.018	12
	2019	140	23	22	0.02	13
	2019	141	24	23	0.021	14
	2019	142	25	24	0.023	16
	2019	143	26	25	0.027	18
	2019	144	27	26	0.029	20
	2019	145	28	27	0.032	22
	2019	146	29	28	0.035	24
	2019	147	30	29	0.04	28
	2019	148	31	30	0.045	31
	2019	149	32	31	0.052	35
	2019	150	33	32	0.058	40
	2019	151	34	33	0.066	44
	2019	152	35	34	0.073	49
	2019	153	36	35	0.082	54
	2019	154	37	36	0.093	61
	2019	155	38	37	0.104	70
	2019	156	39	38	0.115	80
	2019	157	40	39	0.127	91
	2019	158	41	40	0.138	104
	2019	159	42	41	0.147	117
	2019	160	43	42	0.159	130
	2019	161	44	43	0.167	142
	2019	162	45	44	0.179	157
	2019	163	46	45	0.192	173
	2019	164	47	46	0.203	191
	2019	165	48	47	0.216	209
	2019	166	49	48	0.226	228
	2019	167	50	49	0.241	248
	2019	168	51	50	0.254	269
	2019	169	52	51	0.272	287
	2019	170	53	52	0.287	311
	2019	171	54	53	0.304	333
	2019	172	55	54	0.309	359
	2019	173	56	55	0.31	383
	2019	174	57	56	0.312	407
	2019	175	58	57	0.341	426
	2019	176	59	58	0.351	454
	2019	177	60	59	0.351	478
	2019	178	61	60	0.363	504
	2019	179	62	61	0.363	528
	2019	180	63	62	0.364	552
	2019	181	64	63	0.369	581
	2019	182	65	64	0.374	608
	2019	183	66	65	0.387	637
	2019	184	67	66	0.393	666
	2019	185	68	67	0.41	693
	2019	186	69	68	0.424	724
	2019	187	70	69	0.458	743
	2019	188	71	70	0.472	780
	2019	189	72	71	0.492	808
	2019	190	73	72	0.511	840
	2019	191	74	73	0.542	860
	2019	192	75	74	0.571	883
	2019	193	76	75	0.596	907
	2019	194	77	76	0.614	943
	2019	195	78	77	0.64	967
	2019	196	79	78	0.666	993
	2019	197	80	79	0.686	1022
	2019	198	81	80	0.696	1066
	2019	199	82	81	0.709	1106
	2019	200	83	82	0.723	1144
	2019	201	84	83	0.734	1184
	2019	202	85	84	0.754	1208
	2019	203	86	85	0.756	1263
	2019	204	87	86	0.76	1304
	2019	205	88	87	0.757	1347
	2019	206	89	88	0.765	1373
	2019	207	90	89	0.769	1403
	2019	208	91	90	0.773	1430
	2019	209	92	91	0.772	1475
	2019	210	93	92	0.769	1500
	2019	211	94	93	0.765	1514
	2019	212	95	94	0.763	1552
	2019	213	96	95	0.759	1567
	2019	214	97	96	0.753	1597
	2019	215	98	97	0.745	1603
	2019	216	99	98	0.741	1598
	2019	217	100	99	0.734	1584
	2019	218	101	100	0.731	1576
	2019	219	102	101	0.724	1569
	2019	220	103	102	0.714	1548
	2019	221	104	103	0.703	1536
	2019	222	105	104	0.693	1527
	2019	223	106	105	0.682	1506
	2019	224	107	106	0.671	1490
	2019	225	108	107	0.661	1486
	2019	226	109	108	0.651	1482
	2019	227	110	109	0.64	1465
	2019	228	111	110	0.629	1459
	2019	229	112	111	0.619	1457
	2019	230	113	112	0.611	1449
	2019	231	114	113	0.601	1436
	2019	232	115	114	0.592	1420
	2019	233	116	115	0.586	1404
	2019	234	117	116	0.577	1386
	2019	235	118	117	0.568	1371
	2019	236	119	118	0.558	1355
	2019	237	120	119	0.548	1343
	2019	238	121	120	0.538	1330
	2019	239	122	121	0.529	1316
	2019	240	123	122	0.52	1304
	2019	241	124	123	0.513	1293
	2019	242	125	124	0.505	1284
	2019	243	126	125	0.497	1274
	2019	244	127	126	0.49	1266
	2019	245	128	127	0.482	1259
	2019	246	129	128	0.476	1251
	2019	247	130	129	0.471	1244
	2019	248	131	130	0.466	1238
	2019	249	132	131	0.461	1231
	2019	250	133	132	0.457	1225
	2019	251	134	133	0.452	1219
	2019	252	135	134	0.448	1213
	2019	253	136	135	0.443	1208
	2019	254	137	136	0.439	1203
	2019	255	138	137	0.434	1199
	2019	256	139	138	0.43	1194
[truncated: 4 more columns]

## Sheet: SoilWat
			Recommended		1-POSI		2-POSI		Automated irrigation	No irrigation/ Rainfed		Recommended		1-POSI		2-POSI		Automated irrigation	No irrigation/ Rainfed													Recommended		1-POSI		2-POSI		Automated irrigation	No irrigation/ Rainfed		Recommended		1-POSI		2-POSI		Automated irrigation	No irrigation/ Rainfed
		DoY	0-30 cm		0-30 cm		0-30 cm					30-60 cm		30-60 cm		30-60 cm		30-60 cm													2019	0-30 cm		0-30 cm		0-30 cm					30-60 cm		30-60 cm		30-60 cm		30-60 cm
	DOY		(Sim)	(Obs)	(Sim)	(Obs)	(Sim)	(Obs)	T4	T5		(Sim)	(Obs)	(Sim)	(Obs)	(Sim)	(Obs)	T4	T5											DOY		(Sim)	(Obs)	(Sim)	(Obs)	(Sim)	(Obs)	T4	T5		(Sim)	(Obs)	(Sim)	(Obs)	(Sim)	(Obs)	T4	T5
T1	2018	0	0.143		0.143		0.143		0.143	0.143		0.155		0.155		0.155		0.155	0.155											2019	0	0.143		0.143		0.143		0.143	0.143		0.155		0.155		0.155		0.155	0.155
	2018	1	0.139		0.139		0.139		0.139	0.139		0.15		0.15		0.15		0.15	0.15											2019	1	0.139		0.139		0.139		0.139	0.139		0.15		0.15		0.15		0.15	0.15
	2018	2	0.136		0.136		0.136		0.136	0.136		0.148		0.148		0.148		0.148	0.148											2019	2	0.136		0.136		0.136		0.136	0.136		0.148		0.148		0.148		0.148	0.148
	2018	3	0.132		0.132		0.132		0.132	0.132		0.146		0.146		0.146		0.146	0.146											2019	3	0.132		0.132		0.132		0.132	0.132		0.146		0.146		0.146		0.146	0.146
	2018		0.129		0.129		0.129		0.129	0.129		0.144		0.144		0.144		0.144	0.144											2019	4	0.129		0.129		0.129		0.129	0.129		0.144		0.144		0.144		0.144	0.144
	2018	5	0.129		0.129		0.129		0.129	0.129		0.143		0.143		0.143		0.143	0.143											2019	5	0.129		0.129		0.129		0.129	0.129		0.143		0.143		0.143		0.143	0.143
	2018	6	0.129		0.129		0.129		0.129	0.129		0.143		0.143		0.143		0.143	0.143											2019	6	0.129		0.129		0.129		0.129	0.129		0.143		0.143		0.143		0.143	0.143
	2018	7	0.129		0.129		0.129		0.129	0.129		0.143		0.143		0.143		0.143	0.143											2019	7	0.129		0.129		0.129		0.129	0.129		0.143		0.143		0.143		0.143	0.143
	2018	8	0.128		0.128		0.128		0.128	0.128		0.143		0.143		0.143		0.143	0.143											2019	8	0.128		0.128		0.128		0.128	0.128		0.143		0.143		0.143		0.143	0.143
	2018	9	0.128		0.128		0.128		0.128	0.128		0.143		0.143		0.143		0.143	0.143											2019	9	0.128		0.128		0.128		0.128	0.128		0.143		0.143		0.143		0.143	0.143
	2018	10	0.128	0.122	0.128	0.133	0.128	0.125	0.128	0.128		0.143	0.145	0.143	0.15	0.143	0.15	0.143	0.143											2019	10	0.128	0.107	0.128	0.123	0.128	0.104	0.128	0.128		0.143	0.154	0.143	0.155	0.143	0.116	0.143	0.143
	2018	11	0.128		0.128		0.128		0.128	0.128		0.143		0.143		0.143		0.143	0.143											2019	11	0.128		0.128		0.128		0.128	0.128		0.143		0.143		0.143		0.143	0.143
	2018	12	0.128		0.128		0.128		0.128	0.128		0.143		0.143		0.143		0.143	0.143											2019	12	0.128		0.128		0.128		0.128	0.128		0.143		0.143		0.143		0.143	0.143
	2018	13	0.128		0.128		0.128		0.128	0.128		0.143		0.143		0.143		0.143	0.143											2019	13	0.128		0.128		0.128		0.128	0.128		0.143		0.143		0.143		0.143	0.143
	2018	14	0.128		0.127		0.127		0.127	0.127		0.143		0.143		0.143		0.143	0.143											2019	14	0.128		0.127		0.127		0.127	0.127		0.143		0.143		0.143		0.143	0.143
	2018	15	0.128		0.127		0.127		0.127	0.127		0.143		0.143		0.143		0.143	0.143											2019	15	0.128		0.127		0.127		0.127	0.127		0.143		0.143		0.143		0.143	0.143
	2018	16	0.128		0.127		0.127		0.127	0.127		0.143		0.143		0.143		0.143	0.143											2019	16	0.128		0.127		0.127		0.127	0.127		0.143		0.143		0.143		0.143	0.143
	2018	17	0.127		0.127		0.127		0.127	0.127		0.143		0.143		0.143		0.143	0.143											2019	17	0.127		0.126		0.126		0.126	0.126		0.143		0.143		0.143		0.143	0.143
	2018	18	0.127		0.126		0.126		0.126	0.126		0.143		0.143		0.143		0.143	0.143											2019	18	0.127		0.126		0.126		0.126	0.126		0.143		0.143		0.143		0.143	0.143
	2018	19	0.127		0.126		0.126		0.126	0.126		0.143		0.143		0.143		0.143	0.143											2019	19	0.127		0.126		0.126		0.126	0.126		0.143		0.143		0.143		0.143	0.143
	2018	20	0.127		0.126		0.126		0.126	0.126		0.143		0.143		0.143		0.143	0.143											2019	20	0.127		0.126		0.126		0.126	0.126		0.143		0.143		0.143		0.143	0.143
	2018	21	0.127		0.125		0.125		0.125	0.125		0.143		0.143		0.143		0.143	0.143											2019	21	0.127		0.125		0.125		0.125	0.125		0.143		0.143		0.143		0.143	0.143
	2018	22	0.126		0.125		0.125		0.125	0.125		0.143		0.143		0.143		0.143	0.143											2019	22	0.126		0.125		0.125		0.125	0.125		0.143		0.143		0.143		0.143	0.143
	2018	23	0.126		0.124		0.124		0.124	0.124		0.143		0.143		0.143		0.143	0.143											2019	23	0.126		0.124		0.124		0.124	0.124		0.143		0.143		0.143		0.143	0.143
	2018	24	0.126		0.124		0.124		0.124	0.124		0.143		0.143		0.143		0.143	0.143											2019	24	0.126		0.124		0.124		0.124	0.124		0.143		0.143		0.143		0.143	0.143
	2018	25	0.126		0.123		0.123		0.123	0.123		0.143		0.143		0.143		0.143	0.143											2019	25	0.125		0.123		0.123		0.123	0.123		0.143		0.143		0.143		0.143	0.143
	2018	26	0.125		0.123		0.123		0.123	0.123		0.143		0.142		0.142		0.142	0.142											2019	26	0.125		0.123		0.123		0.123	0.123		0.143		0.143		0.143		0.143	0.143
	2018	27	0.125		0.122		0.122		0.122	0.122		0.143		0.142		0.142		0.142	0.142											2019	27	0.125		0.122		0.122		0.122	0.122		0.143		0.143		0.143		0.143	0.143
	2018	28	0.125		0.122		0.122		0.122	0.122		0.143		0.142		0.142		0.142	0.142											2019	28	0.124		0.122		0.122		0.122	0.122		0.143		0.142		0.142		0.142	0.142
	2018	29	0.124		0.121		0.121		0.121	0.121		0.143		0.142		0.142		0.142	0.142											2019	29	0.124		0.121		0.121		0.121	0.121		0.143		0.142		0.142		0.142	0.142
	2018	30	0.124		0.12		0.12		0.12	0.12		0.143		0.141		0.141		0.141	0.141											2019	30	0.123		0.12		0.12		0.12	0.12		0.143		0.142		0.142		0.142	0.142
	2018	31	0.123		0.119		0.119		0.119	0.119		0.143		0.141		0.141		0.141	0.141											2019	31	0.123		0.12		0.12		0.12	0.12		0.143		0.141		0.141		0.141	0.141
	2018	32	0.123		0.118		0.118		0.118	0.118		0.142		0.14		0.14		0.14	0.14											2019	32	0.122		0.118		0.118		0.118	0.118		0.143		0.141		0.141		0.141	0.141
	2018	33	0.122		0.117		0.117		0.117	0.117		0.142		0.14		0.14		0.14	0.14											2019	33	0.122		0.117		0.117		0.117	0.117		0.142		0.141		0.141		0.141	0.141
	2018	34	0.121		0.116		0.116		0.116	0.116		0.142		0.14		0.14		0.14	0.14											2019	34	0.122		0.116		0.116		0.116	0.116		0.142		0.14		0.14		0.14	0.14
	2018	35	0.121		0.115		0.115		0.115	0.115		0.142		0.139		0.139		0.139	0.139											2019	35	0.121		0.114		0.114		0.114	0.114		0.142		0.139		0.139		0.139	0.139
	2018	36	0.12		0.224		0.157		0.114	0.114		0.142		0.168		0.136		0.138	0.138											2019	36	0.12		0.224		0.156		0.113	0.113		0.142		0.168		0.137		0.139	0.139
	2018	37	0.119		0.174		0.148		0.112	0.112		0.141		0.154		0.147		0.138	0.138											2019	37	0.12		0.173		0.147		0.111	0.111		0.142		0.154		0.147		0.138	0.138
	2018	38	0.118		0.154		0.145		0.111	0.111		0.141		0.149		0.147		0.137	0.137											2019	38	0.119		0.154		0.145		0.11	0.11		0.141		0.149		0.147		0.137	0.137
	2018	39	0.117		0.146		0.143		0.109	0.109		0.14		0.147		0.146		0.136	0.136											2019	39	0.118		0.146		0.143		0.108	0.108		0.141		0.147		0.146		0.136	0.136
	2018	40	0.116		0.145		0.142		0.108	0.108		0.14		0.147		0.146		0.135	0.135											2019	40	0.116		0.144		0.141		0.106	0.106		0.14		0.146		0.145		0.134	0.134
	2018	41	0.115		0.144		0.141		0.107	0.107		0.139		0.146		0.145		0.134	0.134											2019	41	0.115		0.142		0.139		0.105	0.105		0.14		0.145		0.144		0.133	0.133
	2018	42	0.114		0.141		0.139		0.105	0.105		0.139		0.145		0.144		0.132	0.132											2019	42	0.113		0.14		0.137		0.103	0.103		0.139		0.144		0.143		0.131	0.131
	2018	43	0.223		0.141		0.138		0.105	0.105		0.167		0.144		0.143		0.131	0.131											2019	43	0.222		0.137		0.134		0.102	0.102		0.167		0.143		0.142		0.129	0.129
	2018	44	0.173		0.138		0.135		0.103	0.103		0.154		0.143		0.142		0.129	0.129											2019	44	0.173		0.134		0.131		0.151	0.1		0.154		0.141		0.14		0.126	0.126
	2018	45	0.154	0.171	0.136	0.14	0.133	0.149	0.151	0.102		0.149	0.153	0.141	0.148	0.141	0.156	0.127	0.127											2019	45	0.154	0.161	0.131	0.14	0.128	0.13	0.144	0.099		0.149	0.151	0.14	0.14	0.139	0.14	0.14	0.124
	2018	46	0.146		0.133		0.13		0.144	0.101		0.147		0.14		0.139		0.142	0.125											2019	46	0.146		0.129		0.126		0.144	0.098		0.147		0.138		0.137		0.137	0.122
	2018	47	0.145		0.131		0.128		0.146	0.1		0.147		0.139		0.138		0.139	0.124											2019	47	0.144		0.126		0.123		0.141	0.097		0.146		0.136		0.135		0.136	0.119
	2018	48	0.144		0.129		0.126		0.144	0.099		0.146		0.138		0.137		0.139	0.122											2019	48	0.142		0.123		0.12		0.139	0.096		0.145		0.135		0.134		0.134	0.117
	2018	49	0.141		0.128		0.125		0.143	0.099		0.145		0.137		0.136		0.138	0.121											2019	49	0.14		0.119		0.116		0.136	0.095		0.144		0.133		0.131		0.132	0.114
	2018	50	0.141		0.126		0.123		0.142	0.098		0.144		0.136		0.135		0.137	0.12											2019	50	0.137		0.116		0.113		0.133	0.095		0.143		0.131		0.13		0.131	0.111
	2018	51	0.138		0.124		0.121		0.14	0.098		0.143		0.135		0.134		0.136	0.118											2019	51	0.134		0.112		0.109		0.13	0.093		0.141		0.129		0.128		0.129	0.108
	2018	52	0.136		0.122		0.119		0.138	0.097		0.141		0.134		0.133		0.135	0.116											2019	52	0.131		0.109		0.107		0.128	0.093		0.14		0.127		0.126		0.128	0.107
	2018	53	0.133		0.118		0.116		0.135	0.096		0.14		0.131		0.131		0.133	0.113											2019	53	0.128		0.106		0.104		0.125	0.092		0.138		0.125		0.123		0.127	0.105
	2018	54	0.131		0.113		0.111		0.131	0.095		0.139		0.128		0.128		0.131	0.109											2019	54	0.126		0.104		0.102		0.122	0.091		0.137		0.122		0.12		0.125	0.103
	2018	55	0.129		0.108		0.106		0.127	0.093		0.138		0.125		0.124		0.128	0.105											2019	55	0.123		0.101		0.1		0.118	0.09		0.135		0.118		0.116		0.122	0.1
	2018	56	0.128		0.105		0.157		0.124	0.092		0.137		0.122		0.121		0.127	0.103											2019	56	0.118		0.098		0.152		0.113	0.088		0.133		0.112		0.109		0.119	0.098
	2018	57	0.126		0.102		0.146		0.121	0.091		0.136		0.119		0.147		0.125	0.101											2019	57	0.116		0.095		0.142		0.107	0.087		0.131		0.106		0.117		0.116	0.096
	2018	58	0.124		0.099		0.14		0.115	0.089		0.135		0.113		0.144		0.121	0.098											2019	58	0.112		0.094		0.145		0.106	0.086		0.129		0.104		0.115		0.115	0.095
	2018	59	0.122		0.096		0.134		0.109	0.088		0.134		0.106		0.14		0.118	0.096											2019	59	0.109		0.092		0.14		0.103	0.085		0.127		0.101		0.112		0.111	0.094
	2018	60	0.118		0.093		0.127		0.104	0.086		0.132		0.101		0.136		0.113	0.094											2019	60	0.106		0.089		0.133		0.153	0.084		0.125		0.097		0.108		0.105	0.093
	2018	61	0.113		0.091		0.124		0.157	0.086		0.129		0.099		0.134		0.111	0.094											2019	61	0.104		0.087		0.127		0.145	0.083		0.122		0.094		0.106		0.121	0.091
	2018	62	0.108		0.09		0.121		0.149	0.085		0.125		0.098		0.132		0.142	0.093											2019	62	0.101		0.085		0.119		0.139	0.082		0.118		0.092		0.103		0.115	0.09
	2018	63	0.227		0.089		0.118		0.147	0.085		0.16		0.096		0.131		0.148	0.092											2019	63	0.221		0.083		0.109		0.131	0.081		0.15		0.09		0.101		0.11	0.089
	2018	64	0.174		0.087		0.114		0.144	0.084		0.151		0.094		0.128		0.145	0.092											2019	64	0.168		0.081		0.101		0.124	0.08		0.144		0.088		0.099		0.107	0.088
	2018	65	0.149		0.086		0.109		0.139	0.083		0.145		0.092		0.125		0.142	0.09											2019	65	0.154		0.08		0.095		0.115	0.08		0.148		0.086		0.096		0.104	0.087
	2018	66	0.143		0.084		0.102		0.133	0.082		0.141		0.09		0.119		0.138	0.089											2019	66	0.145		0.078		0.091		0.107	0.079		0.146		0.085		0.093		0.102	0.086
	2018	67	0.136		0.083		0.1		0.129	0.081		0.137		0.089		0.116		0.136	0.089											2019	67	0.138		0.077		0.087		0.154	0.078		0.142		0.083		0.09		0.099	0.085
	2018	68	0.133		0.082		0.098		0.125	0.081		0.135		0.088		0.112		0.134	0.088											2019	68	0.132		0.076		0.084		0.142	0.077		0.139		0.082		0.088		0.129	0.084
	2018	69	0.131		0.081		0.096		0.122	0.08		0.133		0.087		0.108		0.132	0.087											2019	69	0.124		0.075		0.082		0.141	0.077		0.134		0.081		0.086		0.124	0.084
	2018	70	0.128		0.079		0.093		0.114	0.079		0.132		0.085		0.101		0.127	0.086											2019	70	0.116		0.075		0.081		0.138	0.077		0.129		0.081		0.085		0.122	0.083
	2018	71	0.123		0.078		0.089		0.106	0.078		0.129		0.084		0.095		0.122	0.085											2019	71	0.107		0.074		0.079		0.13	0.076		0.124		0.08		0.084		0.117	0.083
	2018	72	0.118		0.076		0.085		0.099	0.078		0.126		0.082		0.091		0.114	0.084											2019	72	0.1		0.073		0.078		0.123	0.076		0.117		0.079		0.082		0.113	0.082
	2018	73	0.111		0.075		0.082		0.156	0.077		0.121		0.081		0.088		0.106	0.083											2019	73	0.096		0.072		0.076		0.116	0.075		0.109		0.078		0.081		0.109	0.082
	2018	74	0.106		0.074		0.081		0.145	0.076		0.118		0.08		0.086		0.128	0.083											2019	74	0.092		0.072		0.076		0.111	0.075		0.1		0.077		0.08		0.107	0.081
	2018	75	0.103		0.074		0.08		0.145	0.076		0.115		0.079		0.085		0.129	0.082											2019	75	0.088		0.071		0.075		0.161	0.075		0.095		0.077		0.08		0.105	0.081
	2018	76	0.101		0.073		0.078		0.139	0.075		0.112		0.079		0.084		0.125	0.082											2019	76	0.085		0.071		0.074		0.15	0.074		0.091		0.076		0.079		0.148	0.081
	2018	77	0.096		0.072		0.077		0.134	0.075		0.104		0.078		0.083		0.122	0.081											2019	77	0.084		0.07		0.073		0.144	0.074		0.09		0.075		0.078		0.146	0.08
	2018	78	0.092		0.071		0.076		0.125	0.074		0.098		0.077		0.081		0.116	0.08											2019	78	0.082		0.07		0.072		0.141	0.074		0.088		0.075		0.077		0.144	0.08
	2018	79	0.087		0.07		0.074		0.116	0.074		0.093		0.075		0.08		0.111	0.08											2019	79	0.08		0.069		0.072		0.137	0.073		0.086		0.074		0.076		0.142	0.08
	2018	80	0.084	0.1	0.069	0.052	0.073	0.095	0.108	0.073		0.089	0.094	0.074	0.058	0.078	0.086	0.106	0.079											2019	80	0.078	0.069	0.069	0.055	0.071	0.087	0.134	0.073		0.084	0.096	0.074	0.083	0.076	0.09	0.14	0.079
	2018	81	0.082		0.069		0.128		0.158	0.073		0.088		0.073		0.077		0.104	0.079											2019	81	0.078		0.068		0.125		0.126	0.073		0.083		0.073		0.074		0.135	0.079
	2018	82	0.081		0.068		0.139		0.146	0.072		0.086		0.073		0.076		0.146	0.078											2019	82	0.077		0.067		0.138		0.118	0.072		0.083		0.072		0.073		0.13	0.078
	2018	83	0.079		0.067		0.14		0.144	0.072		0.085		0.072		0.076		0.146	0.077											2019	83	0.076		0.067		0.135		0.11	0.072		0.082		0.071		0.073		0.125	0.078
	2018	84	0.078		0.066		0.13		0.138	0.071		0.084		0.071		0.075		0.142	0.077											2019	84	0.075		0.066		0.123		0.102	0.071		0.081		0.07		0.072		0.12	0.077
	2018	85	0.077		0.066		0.116		0.13	0.071		0.082		0.07		0.075		0.137	0.076											2019	85	0.075		0.065		0.116		0.158	0.071		0.08		0.07		0.072		0.117	0.077
	2018	86	0.075		0.065		0.108		0.126	0.07		0.081		0.069		0.075		0.135	0.076											2019	86	0.074		0.065		0.1		0.144	0.07		0.08		0.069		0.072		0.145	0.076
	2018	87	0.074		0.064		0.1		0.121	0.07		0.08		0.069		0.075		0.132	0.075											2019	87	0.074		0.064		0.09		0.142	0.07		0.079		0.068		0.072		0.141	0.075
	2018	88	0.208		0.064		0.091		0.114	0.069		0.09		0.068		0.074		0.127	0.075											2019	88	0.207		0.064		0.08		0.131	0.069		0.088		0.068		0.071		0.135	0.074
	2018	89	0.165		0.063		0.085		0.107	0.069		0.149		0.067		0.074		0.123	0.074											2019	89	0.163		0.063		0.078		0.127	0.069		0.149		0.067		0.07		0.133	0.074
	2018	90	0.15		0.063		0.082		0.103	0.069		0.146		0.067		0.073		0.12	0.074											2019	90	0.148		0.063		0.075		0.124	0.069		0.145		0.066		0.07		0.131	0.074
	2018	91	0.143		0.062		0.078		0.158	0.068		0.142		0.066		0.072		0.115	0.073											2019	91	0.142		0.062		0.073		0.12	0.068		0.14		0.066		0.069		0.128	0.073
	2018	92	0.135		0.062		0.075		0.146	0.067		0.136		0.066		0.071		0.146	0.072											2019	92	0.138		0.062		0.071		0.113	0.068		0.138		0.065		0.068		0.124	0.073
	2018	93	0.131		0.062		0.073		0.144	0.067		0.133		0.065		0.07		0.146	0.072											2019	93	0.129		0.061		0.069		0.102	0.067		0.131		0.065		0.068		0.117	0.072
	2018	94	0.126		0.061		0.071		0.136	0.066		0.13		0.065		0.07		0.141	0.071											2019	94	0.12		0.061		0.068		0.156	0.067		0.125		0.064		0.067		0.109	0.072
	2018	95	0.118		0.061		0.069		0.127	0.066		0.125		0.064		0.069		0.135	0.071											2019	95	0.109		0.06		0.067		0.147	0.066		0.117		0.064		0.066		0.141	0.071
	2018	96	0.111		0.06		0.068		0.118	0.066		0.12		0.064		0.068		0.129	0.07											2019	96	0.105		0.06		0.066		0.143	0.066		0.114		0.064		0.066		0.146	0.07
	2018	97	0.107		0.06		0.067		0.109	0.065		0.117		0.064		0.068		0.124	0.07											2019	97	0.102		0.06		0.065		0.141	0.066		0.111		0.063		0.065		0.143	0.07
	2018	98	0.102		0.06		0.066		0.101	0.065		0.112		0.063		0.067		0.118	0.069											2019	98	0.099		0.06		0.064		0.135	0.065		0.107		0.063		0.065		0.14	0.07
	2018	99	0.097		0.06		0.065		0.16	0.064		0.105		0.063		0.066		0.112	0.069											2019	99	0.095		0.06		0.063		0.128	0.065		0.101		0.063		0.064		0.136	0.069
	2018	100	0.094		0.06		0.064		0.146	0.064		0.1		0.063		0.066		0.145	0.068											2019	100	0.089		0.06		0.062		0.12	0.064		0.094		0.062		0.064		0.13	0.069
	2018	101	0.089		0.06		0.063		0.146	0.064		0.094		0.062		0.065		0.147	0.068											2019	101	0.084		0.06		0.062		0.111	0.064		0.089		0.062		0.064		0.125	0.068
	2018	102	0.084		0.06		0.062		0.146	0.063		0.089		0.062		0.065		0.145	0.067											2019	102	0.082		0.06		0.061		0.102	0.064		0.086		0.062		0.063		0.119	0.068
	2018	103	0.08		0.06		0.062		0.141	0.063		0.085		0.062		0.064		0.142	0.067											2019	103	0.08		0.06		0.061		0.158	0.063		0.084		0.061		0.063		0.112	0.067
	2018	104	0.078		0.06		0.061		0.135	0.063		0.082		0.061		0.064		0.138	0.067											2019	104	0.078		0.06		0.06		0.145	0.063		0.083		0.061		0.062		0.145	0.067
	2018	105	0.075		0.06		0.061		0.13	0.062		0.08		0.061		0.063		0.135	0.066											2019	105	0.076		0.06		0.06		0.143	0.063		0.081		0.061		0.062		0.146	0.067
	2018	106	0.073		0.06		0.111		0.121	0.062		0.077		0.061		0.063		0.13	0.066											2019	106	0.073		0.06		0.11		0.134	0.062		0.078		0.06		0.061		0.139	0.066
	2018	107	0.071		0.06		0.136		0.112	0.062		0.075		0.061		0.062		0.124	0.066											2019	107	0.071		0.06		0.133		0.124	0.062		0.076		0.06		0.061		0.133	0.066
	2018	108	0.069		0.06		0.134		0.106	0.062		0.074		0.06		0.062		0.121	0.065											2019	108	0.07		0.06		0.124		0.116	0.062		0.074		0.06		0.06		0.128	0.066
	2018	109	0.068		0.06		0.12		0.157	0.061		0.072		0.06		0.061		0.115	0.065											2019	109	0.068		0.059		0.114		0.111	0.062		0.073		0.06		0.06		0.125	0.065
	2018	110	0.067		0.059		0.113		0.149	0.061		0.071		0.06		0.061		0.148	0.065											2019	110	0.067		0.059		0.099		0.102	0.061		0.071		0.06		0.06		0.12	0.065
	2018	111	0.066		0.059		0.101		0.144	0.061		0.07		0.06		0.061		0.146	0.065											2019	111	0.066		0.059		0.093		0.161	0.061		0.07		0.06		0.06		0.114	0.065
	2018	112	0.065		0.059		0.092		0.14	0.061		0.069		0.06		0.061		0.142	0.064											2019	112	0.065		0.059		0.086		0.15	0.061		0.069		0.06		0.06		0.147	0.065
	2018	113	0.202		0.059		0.08		0.133	0.06		0.068		0.06		0.061		0.138	0.064											2019	113	0.202		0.059		0.078		0.143	0.061		0.068		0.06		0.06		0.146	0.064
	2018	114	0.16		0.059		0.075		0.126	0.06		0.15		0.06		0.061		0.134	0.064											2019	114	0.157		0.059		0.074		0.138	0.06		0.149		0.06		0.06		0.141	0.064
	2018	115	0.148	0.157	0.059	0.041	0.072	0.066	0.118	0.06		0.146	0.164	0.06	0.045	0.061	0.055	0.128	0.064											2019	115	0.145	0.136	0.059	0.051	0.072	0.072	0.129	0.06		0.144	0.154	0.06	0.052	0.06	0.074	0.135	0.064
	2018	116	0.141		0.059		0.07		0.11	0.06		0.14		0.06		0.06		0.123	0.063											2019	116	0.14		0.059		0.07		0.118	0.06		0.14		0.06		0.06		0.128	0.064
	2018	117	0.138		0.059		0.069		0.104	0.06		0.137		0.06		0.06		0.119	0.063											2019	117	0.131		0.059		0.068		0.106	0.06		0.134		0.06		0.06		0.121	0.063
	2018	118	0.131		0.059		0.067		0.159	0.06		0.133		0.06		0.06		0.114	0.063											2019	118	0.124		0.059		0.067		0.156	0.06		0.129		0.06		0.06		0.115	0.063
	2018	119	0.123		0.059		0.066		0.146	0.06		0.127		0.06		0.06		0.145	0.063											2019	119	0.12		0.059		0.065		0.142	0.06		0.126		0.06		0.06		0.144	0.063
	2018	120	0.116		0.059		0.065		0.143	0.06		0.122		0.06		0.06		0.146	0.063											2019	120	0.113		0.059		0.064		0.144	0.06		0.121		0.06		0.06		0.14	0.063
	2018	121	0.108		0.059		0.064		0.139	0.06		0.116		0.06		0.06		0.142	0.063											2019	121	0.104		0.059		0.063		0.138	0.06		0.115		0.06		0.06		0.136	0.063
	2018	122	0.099		0.059		0.063		0.133	0.06		0.108		0.06		0.06		0.138	0.062											2019	122	0.097		0.059		0.063		0.13	0.06		0.105		0.06		0.06		0.131	0.062
	2018	123	0.094		0.059		0.062		0.128	0.06		0.1		0.06		0.06		0.136	0.062											2019	123	0.089		0.059		0.062		0.124	0.06		0.092		0.06		0.06		0.127	0.062
	2018	124	0.089		0.059		0.061		0.123	0.06		0.094		0.06		0.06		0.133	0.062											2019	124	0.079		0.059		0.061		0.117	0.06		0.083		0.06		0.06		0.122	0.062
	2018	125	0.084		0.059		0.061		0.113	0.06		0.088		0.06		0.06		0.126	0.062											2019	125	0.075		0.059		0.061		0.112	0.06		0.079		0.06		0.06		0.12	0.062
	2018	126	0.078		0.059		0.06		0.109	0.06		0.082		0.06		0.06		0.123	0.062											2019	126	0.072		0.059		0.06		0.106	0.06		0.076		0.06		0.06		0.115	0.062
	2018	127	0.074		0.059		0.06		0.1	0.059		0.078		0.06		0.06		0.118	0.062											2019	127	0.07		0.059		0.06		0.162	0.06		0.074		0.06		0.06		0.112	0.062
	2018	128	0.071		0.059		0.06		0.161	0.059		0.075		0.06		0.06		0.112	0.061											2019	128	0.068		0.059		0.06		0.149	0.059		0.072		0.06		0.06		0.146	0.061
	2018	129	0.069		0.059		0.06		0.147	0.059		0.073		0.06		0.06		0.145	0.061											2019	129	0.067		0.059		0.06		0.143	0.059		0.07		0.06		0.06		0.146	0.061
	2018	130	0.068		0.059		0.06		0.144	0.059		0.072		0.06		0.06		0.147	0.061											2019	130	0.065		0.059		0.06		0.138	0.059		0.069		0.06		0.06		0.142	0.061
	2018	131	0.066		0.059		0.111		0.143	0.059		0.07		0.06		0.06		0.144	0.061											2019	131	0.064		0.059		0.111		0.131	0.059		0.068		0.06		0.06		0.137	0.061
	2018	132	0.065		0.059		0.141		0.138	0.059		0.069		0.06		0.059		0.14	0.061											2019	132	0.063		0.059		0.138		0.123	0.059		0.067		0.06		0.059		0.133	0.061
	2018	133	0.064		0.058		0.144		0.134	0.059		0.068		0.06		0.059		0.138	0.061											2019	133	0.062		0.058		0.131		0.115	0.059		0.066		0.06		0.059		0.127	0.061
	2018	134	0.063		0.058		0.133		0.128	0.059		0.067		0.06		0.059		0.135	0.061											2019	134	0.062		0.058		0.117		0.106	0.059		0.065		0.06		0.059		0.122	0.061
	2018	135	0.062		0.058		0.124		0.123	0.059		0.066		0.06		0.059		0.131	0.06											2019	135	0.061		0.058		0.101		0.155	0.059		0.064		0.06		0.059		0.115	0.06
	2018	136	0.061		0.056782		0.113		0.117	0.059		0.065		0.05874		0.059		0.127	0.06											2019	136	0.06		0.058		0.09		0.143	0.059		0.064		0.06		0.059		0.144	0.06
	2018	137	0.061		0.0555896		0.102		0.11	0.059		0.064		0.0575065		0.059		0.123	0.06											2019	137	0.06		0.058		0.078		0.139	0.059		0.063		0.06		0.059		0.139	0.06
	2018	138	0.2		0.0544222		0.099858		0.1	0.057761		0.064		0.0562988		0.057761		0.117	0.05874											2019	138	0.2		0.056782		0.074		0.129	0.059		0.062		0.05874		0.059		0.132	0.06
	2018	139	0.163		0.0532793		0.097761		0.16	0.056548		0.147		0.0551165		0.056548		0.11	0.0575065											2019	139	0.16		0.0555896		0.072446		0.122	0.059		0.142		0.0575065		0.057761		0.128	0.06
	2018	140	0.151		0.0521605		0.095708		0.145	0.0553605		0.147		0.0539591		0.0553605		0.145	0.0562988											2019	140	0.145		0.0544222		0.0709246		0.113	0.057761		0.143		0.0562988		0.056548		0.123	0.05874
	2018	141	0.145		0.0510651		0.0936981		0.142	0.0541979		0.145		0.052826		0.0541979		0.145	0.0551165											2019	141	0.137		0.0532793		0.0694352		0.107	0.056548		0.138		0.0551165		0.0553605		0.118	0.0575065
	2018	142	0.139		0.0499927		0.0917305		0.139018	0.0530598		0.141		0.0517166		0.0530598		0.141955	0.0539591											2019	142	0.127		0.0521605		0.0679771		0.158	0.0553605		0.13		0.0539591		0.0541979		0.113	0.0562988
	2018	143	0.133		0.0489429		0.0898041		0.136099	0.0519455		0.137		0.0506306		0.0519455		0.138974	0.052826											2019	143	0.118		0.0510651		0.0665496		0.144	0.0541979		0.123		0.052826		0.0530598		0.144	0.0551165
	2018	144	0.127		0.0479151		0.0879182		0.133241	0.0508547		0.132		0.0495673		0.0508547		0.136055	0.0517166											2019	144	0.107		0.0499927		0.065152		0.140976	0.0530598		0.115		0.0517166		0.0519455		0.140976	0.0539591
	2018	145	0.118		0.0469089		0.086072		0.130442	0.0497867		0.125		0.0485264		0.0497867		0.133198	0.0506306											2019	145	0.098		0.0489429		0.0637838		0.138016	0.0519455		0.106		0.0506306		0.0508547		0.138016	0.052826
	2018	146	0.109		0.0459238		0.0842645		0.127703	0.0487412		0.119		0.0475074		0.0487412		0.130401	0.0495673											2019	146	0.093		0.0479151		0.0624444		0.135117	0.0508547		0.098		0.0495673		0.0497867		0.135117	0.0517166
	2018	147	0.1		0.0449594		0.0824949		0.125021	0.0477176		0.112		0.0465097		0.0477176		0.127663	0.0485264											2019	147	0.086		0.0469089		0.061133		0.13228	0.0497867		0.09		0.0485264		0.0487412		0.13228	0.0506306
		148	0.099		0.0440152		0.0807625		0.122396			0.109648		0.045533		0.0467156		0.123833													148	0.084194		0.0459238		0.0598492		0.129502	0.0487412		0.08811		0.0475074		0.0477176		0.129502	0.0495673
T2	2018	149	0.096921		0.0430909		0.0790665		0.119826			0.107345		0.0445768		0.0457345		0.121232												2018	149	0.0824259		0.0449594		0.0585924		0.126782	0.0477176		0.0862597		0.0465097		0.0467156		0.126782	0.0485264
	2018	150	0.0948857	0.109	0.042186	0.035	0.0774061	0.067	0.117309			0.105091	0.094	0.0436407	0.038	0.0447741	0.06	0.118686												2018	150	0.080695	0.06	0.0440152	0.038	0.057362	0.041	0.12412			0.0844482	0.055	0.045533	0.3	0.0457345	0.045	0.12412
	2018	151	0.0928931		0.0413001		0.0757806		0.1			0.102884		0.0427242		0.0438339		0.118												2018	151	0.0790004		0.0430909		0.0561574		0.162			0.0826748		0.0445768		0.0447741		0.112
	2018	152	0.0909423		0.0404328		0.0741892		0.161			0.100724		0.041827		0.0429133		0.112												2018	152	0.0773414		0.042186		0.0549781		0.149			0.0809387		0.0436407		0.0438339		0.146
	2018	153	0.0890325		0.0395837		0.0726312		0.147			0.0986085		0.0409487		0.0420122		0.145												2018	153	0.0757172		0.0413001		0.0538235		0.143			0.0792389		0.0427242		0.0429133		0.146
	2018	154	0.0871628		0.0387524		0.0711059		0.144			0.0965377		0.0400887		0.0411299		0.147												2018	154	0.0741271		0.0404328		0.0526932		0.138			0.0775749		0.041827		0.0420122		0.142
	2018	155	0.0853324		0.0379386		0.0696127		0.143			0.0945104		0.0392469		0.0402662		0.144												2018	155	0.0725705		0.0395837		0.0515867		0.131			0.0759458		0.0409487		0.0411299		0.137
	2018	156	0.0835404		0.0371419		0.0681509		0.138			0.0925257		0.0384227		0.0394206		0.14												2018	156	0.0710465		0.0387524		0.0505033		0.123			0.074351		0.0400887		0.0402662		0.133
	2018	157	0.0817861		0.036362		0.0667197		0.134			0.0905826		0.0376158		0.0385928		0.138												2018	157	0.0695545		0.0379386		0.0494428		0.115			0.0727896		0.0392469		0.0394206		0.127
	2018	158	0.0800686		0.0355984		0.0653186		0.128			0.0886804		0.0368259		0.0377823		0.135												2018	158	0.0680939		0.0371419		0.0484045		0.106			0.071261		0.0384227		0.0385928		0.122
	2018	159	0.0783871		0.0348508		0.0639469		0.123			0.0868181		0.0360525		0.0369889		0.131												2018	159	0.0666639		0.036362		0.047388		0.155			0.0697646		0.0376158		0.0377823		0.115
	2018	160	0.076741		0.0341189		0.062604		0.117			0.0849949		0.0352954		0.0362121		0.127												2018	160	0.065264		0.0355984		0.0463928		0.143			0.0682995		0.0368259		0.0369889		0.144
	2018	161	0.0751294		0.0334024		0.0612893		0.11			0.08321		0.0345542		0.0354517		0.123												2018	161	0.0638934		0.0348508		0.0454186		0.139			0.0668652		0.0360525		0.0362121		0.139
	2018	162	0.0735517		0.032701		0.0600022		0.1			0.0814626		0.0338286		0.0347072		0.117												2018	162	0.0625517		0.0341189		0.0444648		0.129			0.065461		0.0352954		0.0354517		0.132
	2018	163	0.0720071		0.0320143		0.0587422		0.16			0.0797519		0.0331182		0.0339783		0.11												2018	163	0.0612381		0.0334024		0.043531		0.122			0.0640864		0.0345542		0.0347072		0.128
	2018	164	0.070495		0.031342		0.0575086		0.145			0.0780771		0.0324227		0.0332648		0.145												2018	164	0.0599521				0.0426169		0.113			0.0627405				0.0339783		0.123
	2018	165	0.0690146		0.0306838		0.0563009		0.142			0.0764375		0.0317418		0.0325662		0.145												2018	165	0.0586931				0.0417219		0.107			0.061423				0.0332648		0.118
	2018	166	0.0675653				0.0551186		0.139018			0.0748323				0.0318823		0.141955												2018	166	0.0574605				0.0408458		0.158			0.0601331				0.0325662		0.113
	2018	167	0.0661464				0.0539611		0.136099			0.0732608				0.0312128		0.138974												2018	167	0.0562539				0.039988		0.144			0.0588703				0.0318823		0.144
	2018	168	0.0647573				0.0528279		0.133241			0.0717224				0.0305573		0.136055												2018	168	0.0550725				0.0391483		0.140976			0.057634				0.0312128		0.140976
	2018	169	0.0633974				0.0517185		0.130442			0.0702162				0.0299156		0.133198												2018	169	0.053916				0.0383261		0.138016			0.0564237				0.0305573		0.138016
	2018	170	0.0620661				0.0506325		0.127703			0.0687416				0.0292874		0.130401												2018	170	0.0527838				0.0375213		0.135117			0.0552388				0.0299156		0.135117
	2018	171	0.0607627				0.0495692		0.125021			0.0672981				0.0286724		0.127663												2018	171	0.0516753						0.13228			0.0540788						0.13228
	2018	172	0.0594867				0.0485282		0.122396			0.0658848				0.0280702		0.123833												2018	172	0.0505901						0.129502			0.0529432						0.129502
	2018	173	0.0582375				0.0475091		0.119826			0.0645012				0.0274808		0.121232												2018	173	0.0495277						0.126782			0.0518313						0.126782
	2018	174	0.0570145				0.0465114		0.117309			0.0631467				0.0269037		0.118686												2018	174	0.0484876						0.12412			0.0507429						0.12412
	2018	175	0.0558172						0.1			0.0618206						0.118												2018	175	0.0474694						0.162			0.0496773						0.112
	2018	176	0.054645						0.161			0.0605224						0.112												2018	176							0.149									0.146
	2018	177	0.0534975						0.147			0.0592514						0.145												2018	177							0.143									0.146
	2018	178	0.052374						0.144			0.0580071						0.147												2018	178							0.138									0.142
	2018	179	0.0512742						0.143			0.056789						0.144												2018	179							0.131									0.137
	2018	180	0.0501974						0.138			0.0555964						0.14												2018	180							0.123									0.133
	2018	181	0.0491433						0.134			0.0544289						0.138												2018	181							0.115									0.127
	2018	182							0.128									0.135												2018	182							0.106									0.122
	2018	183							0.123									0.131												2018	183							0.155									0.115
	2018	184							0.117									0.127												2018	184							0.143									0.144
	2018	185							0.11									0.123												2018	185							0.139									0.139
	2018	186							0.1									0.117												2018	186							0.129									0.132
	2018	187							0.16									0.11												2018	187							0.122									0.128
	2018	188							0.145									0.145												2018	188							0.113									0.123
	2018	189																												2018	189
	2018	190																												2018	190
		R²			2018									2018
			0-30 cm									30-60 cm
			Recommended		1-POSI		2-POSI					Recommended		1-POSI		2-POSI
		DAS	Sim	Obs	Sim	Obs	Sim	Obs				Sim	Obs	Sim	Obs	Sim	Obs
		10	0.128	0.122	0.128	0.133	0.128	0.125				0.143	0.145	0.143	0.15	0.143	0.15
		45	0.154	0.171	0.136	0.14	0.133	0.149				0.149	0.153	0.141	0.148	0.141	0.156
		85	0.084	0.1	0.069	0.052	0.073	0.095				0.089	0.094	0.074	0.058	0.078	0.086
		135	0.148	0.157	0.059	0.041	0.072	0.066				0.146	0.164	0.06	0.045	0.061	0.055
		150	0.0948857	0.109	0.042186	0.035	0.0774061	0.067				0.105091	0.094	0.0436407	0.038	0.0447741	0.06
					2019									2019
			Recommended		1-POSI		2-POSI					Recommended		1-POSI		2-POSI
			Sim	Obs	Sim	Obs	Sim	Obs				Sim	Obs	Sim	Obs	Sim	Obs
			0.128	0.107	0.128	0.123	0.128	0.104				0.143	0.154	0.143	0.155	0.143	0.116
			0.154	0.161	0.131	0.14	0.128	0.13				0.149	0.151	0.14	0.14	0.139	0.14
			0.078	0.069	0.069	0.055	0.071	0.087				0.084	0.096	0.074	0.083	0.076	0.09
			0.145	0.136	0.059	0.051	0.072	0.072				0.144	0.154	0.06	0.052	0.06	0.074
			0.080695	0.06	0.0440152	0.038	0.057362	0.041				0.0844482	0.055	0.045533	0.3	0.0457345	0.045
				0.949857		0.981339		0.791983					0.884451		0.0262274		0.879706
			.
			Recommended		1-POSI		2-POSI		Recommended		1-POSI		2-POSI
			0-30 cm						30-60 cm
			2018	2019	2018	2019	2018	2019	2018	2019	2018	2019	2018	2019
		Mean_Obs	0.121777	0.117139	0.0868372	0.086203	0.0966812	0.0912724	0.126418	0.12089	0.0923281	0.0925066	0.0935548	0.0927469
		SD_Obs	0.0312847	0.0357525	0.042421	0.0405263	0.0309896	0.0340226	0.0274923	0.0335484	0.0466049	0.0458555	0.0457635	0.0453533
		Mean_Sim	0.1318	0.1066	0.0802	0.0814	0.1004	0.0868	0.13	0.122	0.0878	0.146	0.1014	0.093
		SD_Sim	0.0308172	0.0430384	0.0518141	0.0465543	0.0363841	0.0334619	0.0335485	0.044872	0.0563312	0.0957053	0.0485984	0.0367831
		R²	0.90931	0.949857	0.984991	0.981339	0.849233	0.791983	0.925243	0.884451	0.987668	0.0262274	0.970329	0.879706
		Student't'	0.0771609	0.108805	0.249148	0.27349	0.593436	0.562107	0.481928	0.894252	0.419855	0.348063	0.111947	0.974665
		MAE	0.0124229	0.013339	0.0102372	0.00840305	0.0114812	0.0116724	0.00801823	0.0128896	0.0101281	0.0566934	0.0102452	0.0113469
		MBE	0.0100229	-0.010539	-0.0066372	-0.00480305	0.00371878	-0.00447239	0.00358177	0.00111035	-0.00452814	0.0534934	0.00784518	0.000253092
		RMSE	0.0131241	0.0146989	0.0118797	0.00896865	0.0133663	0.0148574	0.00991981	0.0157239	0.0110528	0.114055	0.0110075	0.0149836
		d-Stat	0.996861	0.995083	0.993896	0.996491	0.994075	0.991159	0.998118	0.994708	0.995351	0.727314	0.995938	0.991803
